## Functional diversification enabled grassy biomes to fill global climate space

Caroline E. R. Lehmann<sup>1,2\*</sup>, Daniel M. Griffith<sup>3</sup>, Kimberley J. Simpson<sup>4</sup>, T. Michael Anderson<sup>5</sup>, Sally Archibald<sup>2</sup>, David J. Beerling<sup>4</sup>, William J. Bond<sup>6</sup>, Elsie Denton<sup>7</sup>, Erika J. Edwards<sup>8</sup>, Elisabeth J. Forrester<sup>9</sup>, David L. Fox<sup>10</sup>, Damien Georges<sup>11</sup>, William A. Hoffmann<sup>12</sup>, Thomas Kluyver<sup>13</sup>, Ladislav Mucina<sup>14,15</sup>, Stephanie Pau<sup>16</sup>, Jayashree Ratnam<sup>17</sup>, Nicolas Salamin<sup>18</sup>, Bianca Santini<sup>4</sup>, Melinda D. Smith<sup>7</sup>, Elizabeth L. Spriggs<sup>8</sup>, Rebecca Westley<sup>4</sup>, Christopher J. Still<sup>3</sup>, Caroline A.E. Strömberg<sup>19</sup> and Colin P. Osborne<sup>4\*</sup>

<sup>1</sup>*School of GeoSciences, University of Edinburgh, Edinburgh EH9 3FF, UK*

<sup>2</sup>*Centre for African Ecology, School of Animal and Plant Sciences, University of Witwatersrand, Johannesburg*

<sup>3</sup>*Dept. Forest Ecosystems & Society, Oregon State University, Corvallis, OR 97331, USA*

<sup>4</sup>*Dept. Animal & Plant Sciences, University of Sheffield, Sheffield S10 2TN, UK*

<sup>5</sup>*Dept. Biology, Wake Forest University, Winston-Salem, NC 27109, USA*

<sup>6</sup>*Dept. Botany, University of Cape Town, Cape Town, ZA-7701, South Africa*

<sup>7</sup>*Dept. Biology, Colorado State University, Ft Collins, CO, 80523, USA*

<sup>8</sup>*Dept. Ecology & Evolutionary Biology, Yale University, 165 Prospect St., New Haven, CT 06520, USA*

<sup>9</sup>*Dept. Viticulture & Enology, University of California, Davis, CA 95616, USA*

<sup>10</sup>*Dept. Earth Sciences, University of Minnesota, Minneapolis MN 55455, USA*

<sup>11</sup>*Laboratoire d'Ecologie Alpine (LECA), Univ. Grenoble Alpes, CNRS, F-38000 Grenoble, France*

<sup>12</sup>*Dept. Plant Biology, North Carolina State University, Raleigh, NC 27695, USA*

<sup>13</sup>*Computational Modelling Group, Faculty of Engineering & the Environment, University of Southampton, Southampton SO17 1BJ, UK*

<sup>14</sup>*Harry Butler Institute, Murdoch University, 90 South Street, Murdoch WA 6150, Perth, Australia*

<sup>15</sup>*Dept. Geography & Environmental Sciences, Stellenbosch University, Private Bag X1, Matieland 7602, Stellenbosch, South Africa*

<sup>16</sup>*Dept. Geography, Florida State University, Tallahassee, FL 32306-2190, USA*

<sup>17</sup>*National Centre for Biological Sciences, Tata Institute of Fundamental Research, Gandhi Krishi Vignana Kendra, Bellary Road, Bangalore 560 065, India.*

<sup>18</sup>*Dept. Ecology & Evolution, University of Lausanne, CH-1015 Lausanne, Switzerland*

<sup>19</sup>*Dept. Biology & the Burke Museum of Natural History & Culture, University of Washington, Seattle, WA 98195, USA*

\* Corresponding Authors

**Abstract:** Global change impacts on the Earth System are typically evaluated using biome classifications based on trees and forests. However, during the Cenozoic, many terrestrial biomes were transformed through the displacement of trees and shrubs by grasses. While grasses comprise 3% of vascular plant species, they are responsible for more than 25% of terrestrial photosynthesis. Critically, grass dominance alters ecosystem dynamics and function by introducing new ecological processes, especially surface fires and grazing. However, the large grassy component of many global biomes is often neglected in their descriptions, thereby ignoring these important ecosystem processes. Furthermore, the functional diversity of grasses in vegetation models is usually reduced to C<sub>3</sub> and C<sub>4</sub> photosynthetic plant functional types, omitting other relevant traits. Here, we compile available data to determine the global distribution of grassy vegetation and key traits related to grass dominance. Grassy biomes (where > 50% of the ground layer is covered by grasses) occupy almost every part of Earth's vegetated climate space, characterising over 40% of the land surface. Major evolutionary lineages of grasses have specialised in different environments, but species from only three grass lineages occupy 88% of the land area of grassy vegetation, segregating along gradients of temperature, rainfall and fire. The environment occupied by each lineage is associated with unique plant trait combinations, including C<sub>3</sub> and C<sub>4</sub> photosynthesis, maximum plant height, and adaptations to fire and aridity. There is no single global climatic limit where C<sub>4</sub> grasses replace C<sub>3</sub> grasses. Instead this ecological transition varies biogeographically, with continental disjunctions arising through contrasting evolutionary histories.

**Significance statement:** Worldviews of vegetation generally focus on trees and forests but grasses characterize the ground layer over 40% of the Earth's vegetated land surface. This omission is important because grasses transform surface-atmosphere exchanges, biodiversity and disturbance regimes. We looked beneath the trees to produce the first global map of grass-dominated biomes. Grassy biomes occur in virtually every climate on Earth. However, three lineages of grasses are much more successful than others, characterizing 88% of the land area of grassy biomes. Each of these grass lineages evolved ecological specializations related to aridity, freezing and fire. Recognizing the extent and causes of grass dominance beneath trees is important because grassy vegetation plays vital roles in the dynamics of our biosphere and human wellbeing.

## 1 **Introduction**

2 The global distribution of terrestrial biomes determines global patterns of carbon storage and  
3 biodiversity (1). Delineation of biome distributions is crucial because it underpins evaluations  
4 of vegetation feedbacks on climate (2), extinction threats for biodiversity (3), and strategies  
5 for monitoring and reversing land-use change and degradation (4). Global studies of biome  
6 distributions typically focus on forests and trees (4-6), following the long-established  
7 paradigm in modern ecology of deterministic relationships between forest distributions and  
8 environment (7). Within this paradigm, there is a widely held perception that grassy  
9 vegetation only occupies semi-arid climates. However, it is increasingly recognized that biome  
10 limits are not deterministically linked to climate but arise from multi-directional feedbacks  
11 between plant functional traits, environment, and disturbance. These processes operate over  
12 evolutionary and ecological timescales (8) creating biogeographic contingencies in biome-  
13 environment relationships (9).

14 Grassy biomes require open-canopied tree layers (or no tree layer) to permit enough  
15 light to penetrate for grass photosynthesis. As a result, grasses dominate the ground layer  
16 when the rate of woody plant recruitment and growth is limited by climate, soil, drainage,  
17 disturbance conditions or light competition (10-12). “Grassy biomes” defined in this way  
18 include tropical savannas, montane grasslands, grassy deserts, temperate steppe grasslands,  
19 boreal parklands, and many temperate woodlands. The distinction of whether the ground  
20 layer is dominated by grasses (Poaceae) is fundamental to understanding global relationships  
21 among plants, climate, and disturbance (13). While, both trees and grasses are clearly  
22 important in driving vegetation dynamics, grass dominance causes a fundamental shift in  
23 disturbance regimes, whereby the consumption of ground layer biomass by fire and grazing  
24 reinforces grass dominance and maintains open tree canopies (10). Grass cover and biomass

25 in the ground layer also affects surface energy, carbon, nutrient and water cycling by, for  
26 example, altering rates of decomposition, water infiltration and absorption of sunlight. Grass  
27 dominance therefore leads to novel ecological processes and properties in the Earth System,  
28 including frequent fire and grazing by mammals (14).

29         During the Cenozoic grasses displaced forests and shrublands by altering disturbance  
30 regimes at large scales across tropical and temperate regions (14, 15). The global expansion  
31 of grassy vegetation enabled major faunal and floral radiations (14, 16), and is linked to events  
32 in human behavioral evolution (17, 18). Today, natural grassy biomes provide grazing lands,  
33 water resources and numerous ecosystem services that directly support over a billion people  
34 (19). Yet, despite this social and economic significance, and the profound disturbance  
35 feedbacks engendered by grassy vegetation (20), understanding of grassy biomes is  
36 geographically biased towards few regions (e.g., South and East African savannas, North  
37 American grasslands), with the global limits of grassy biomes poorly defined.

38         When considering the limits to grassy biomes, the grass diversity present in a system  
39 is generally reduced to a distinction between species using the C<sub>3</sub> or C<sub>4</sub> photosynthetic  
40 pathways. If all else is equal, C<sub>4</sub> grasses should outcompete C<sub>3</sub> grasses under conditions of high  
41 light and temperature as well as low CO<sub>2</sub> (21-23). This physiologically based model explains,  
42 in general terms, how C<sub>4</sub> grasses dominate tropical regions and C<sub>3</sub> grasses dominate  
43 temperate and high-altitude environments under current atmospheric CO<sub>2</sub> levels [ppm ≈ 408].  
44 The physiological mechanisms underpinning this model have critical impacts for predicting  
45 vegetation trajectories with global climate and atmospheric CO<sub>2</sub> changes (22) yet attempts to  
46 parse the consequences of grass physiology for global vegetation is often reliant on sparsely  
47 validated modelling (24). Further, a focus on photosynthetic type belies the rich phylogenetic  
48 diversity within grasses independent of photosynthetic pathway (14). Grasses are unusual

49 among vascular plants because C<sub>4</sub> photosynthesis evolved in up to 24 independent lineages  
50 (25), conferring unique ecological characters to each C<sub>4</sub> lineage inherited from its C<sub>3</sub> ancestors  
51 (26). Photosynthetic type therefore interacts with different combinations of other functional  
52 traits to determine plant performance under varied environmental conditions (27, 28), but  
53 the influence of these interactions on the global biogeography of grassy biomes is unknown.

54 Here, we focus on grass-dominated systems to address three questions. First, what are  
55 the global limits of grassy biomes? Second, to what extent is grassy biome structure  
56 contingent on evolutionary history, whereby independent phylogenetic lineages characterize  
57 grassy biomes on each continent? Finally, how do functional traits of the descendant species  
58 of each lineage relate to climate and fire? Our findings have significant implications for the  
59 representation of terrestrial vegetation processes in Earth System Models.

60

61 **Identifying grassy biomes.** Our dataset provides the first spatially explicit, functional  
62 classification of grassy vegetation at the global scale (Figs. 1 and S1). Necessarily, our approach  
63 that focusses on the ground layer contrasts with efforts to map biomes using remotely sensed  
64 tree cover or biomass (4, 29). Such studies generally misclassify extensive areas of tropical  
65 savanna as forest or degraded forest (30, 31). Global synthesis of grassy biomes has been  
66 prohibited as satellite remote sensing does not see through a tree canopy. Therefore, we  
67 mapped grassy formations by integrating and re-classifying 20 existing national and regional  
68 vegetation maps produced using botanical data and detailed vegetation descriptions (see  
69 Methods and SI).

70 What is a grassy biome? We defined vegetation units as grassy where the ground layer  
71 is characterized by Poaceae and where grasses comprised > 50% of ground layer cover based  
72 on descriptions within vegetation maps and associated literature (see Methods and SI). A

73 relatively small set of species often accounts for the majority of biomass in plant communities,  
74 whether these are communities dominated by trees or grasses, and these species exert major  
75 controls over ecosystem processes (32) and ecosystem services (33). Focusing on dominant  
76 and characteristic species provides one way to explore links between evolutionary history and  
77 ecosystem ecology at large scales (14). Through this process we identified 1,154 grass species  
78 (~10% of the total grass flora) characterizing grassy vegetation.

79

## 80 **Results and Discussion**

81 **Global limits of grassy biomes.** Grasses can dominate ground layer vegetation in all but the  
82 coldest and driest climates on Earth (Figs. 1 - 2). We estimate that vegetation with a grass-  
83 dominated ground layer originally covered ~ 41% of the vegetated land surface, although  
84 much is now under cultivation. Critically, grasses can dominate the ground layer in every  
85 climate where woody vegetation can persist (Figs. 1 - 2). While steppe grasslands and prairies  
86 occupy a large fraction of the global land area in dry temperate climates (Figs. 2, S2-S3), and  
87 savannas and grasslands occupy most of the tropics, grass-dominated ground layers occupy  
88 extensive areas in any other part of the vegetated global climate space (Fig. 2 and Fig. S4).

89 Members of 16 independently derived C<sub>4</sub> grass lineages dominate within at least one  
90 vegetation unit worldwide (Fig. 1). However, two C<sub>4</sub> lineages and one C<sub>3</sub> lineage dominate  
91 over 88% of the land area of grassy vegetation: C<sub>4</sub> Andropogoneae, 37% (1189 species in the  
92 lineage); C<sub>4</sub> Chloridoideae, 14% (1601 species in the lineage); and C<sub>3</sub> BEP, 38% (Fig. 1). The vast  
93 majority of C<sub>3</sub> BEP taxa belong to Pooideae (4234 species in the lineage). In contrast, C<sub>3</sub> species  
94 of the PACMAD clade dominate only 2% of grassy biomes (Fig. 1); these are the closest  
95 relatives of C<sub>4</sub> grasses and are restricted to warm, wet areas (Figs. S2-S4). Of the remaining



96 area of grassy vegetation, 6.6% is characterised by a mix of lineages, and the rest dominated  
97 by 13 other, independently derived, C<sub>4</sub> lineages (Fig. 1 and Table S1).

98 The three dominant lineages sort in climate space. C<sub>3</sub> Pooideae dominate cooler, drier  
99 climates, whereas C<sub>4</sub> Andropogoneae and Chloridoideae dominate grassy biomes in warmer  
100 climates (Figs. 3, S3-S6). However, precipitation sorts the C<sub>4</sub> lineages, with peak dominance of  
101 Andropogoneae occurring at ~ 1200mm MAP (Figs. 4, S3-S5), coinciding almost precisely with  
102 the global peak in fire frequency (Fig. 4). This is also the climate space where disturbance-  
103 driven feedbacks are considered to play a major role in maintaining open (i.e., grassy) or  
104 closed (i.e., woody) vegetation (34). In contrast, the peak dominance of Chloridoideae occurs  
105 at ~350mm MAP (Figs. 4, S3-S4), within semi-arid climate zones occupied by both dry savannas  
106 and shrublands/thickets e.g., (35). Temperature seasonality also differs among the C<sub>4</sub> lineages,  
107 with Chloridoideae dominating in regions with strong seasonality, and Andropogoneae  
108 dominating in more aseasonal environments (Fig. S5).

109

110 **Continental disjunctions in C<sub>3</sub> and C<sub>4</sub> lineage distributions.** Globally, the mean growing  
111 season temperature where dominance of grasses transitions from C<sub>3</sub> to C<sub>4</sub> types varies starkly  
112 among continents, from 8.5-26.1 °C, with a global mean of 17.2 °C (Fig. 3). Lineages using C<sub>3</sub>  
113 and C<sub>4</sub> photosynthetic pathways are clearly sorted by growing season temperature and mean  
114 annual temperature (Figs. 3 and S3-6). The C<sub>3</sub> Pooideae lineage has specialized and radiated  
115 in cold environments by evolving physiological cold acclimation to protect tissues from  
116 freezing damage, and vernalization to synchronize flowering with the growing season (36, 37).  
117 Conversely, in tropical regions, the repeated evolution of C<sub>4</sub> photosynthesis appears vital in  
118 expanding the range of grassy biomes, by enabling colonization of hot, high light, and  
119 seasonally dry habitats across a wide span of rainfall (38, 39).

120           The C<sub>3</sub> Pooideae occupy regions with lower winter temperatures and shorter droughts  
121 than the C<sub>4</sub> lineages (Fig. S7). C<sub>3</sub> Pooideae dominate grassy biomes to much higher  
122 temperatures in the Palearctic than the Nearctic realm, although distributions of C<sub>4</sub>  
123 Andropogoneae and Chloridoideae in these realms are similar (Fig. 3). Conversely, C<sub>3</sub> Pooideae  
124 are confined to the geographically restricted colder parts of the Afrotropics and Indo-Malay  
125 realms, and C<sub>4</sub> Andropogoneae dominate at much lower temperatures in these regions (Fig.  
126 3). The sorting of C<sub>3</sub> and C<sub>4</sub> grass species along local and regional temperature gradients is well  
127 established (40, 41), and the crossover temperature can be modified by ecosystem factors  
128 (e.g., tree cover) (42). However, our observations are broadly consistent with model  
129 predictions of carbon assimilation (22, 23, 43), as modeled crossover temperatures under low  
130 light conditions and modern CO<sub>2</sub> levels occurs at ~20-22 °C.

131           In our data, some species of both Andropogoneae and Chloridoideae lineages have  
132 adapted to low mean annual temperatures and may persist in grassy vegetation within cool  
133 parts of each realm (e.g. Fig. 3). Given equal investment in the carbon-fixing enzyme Rubisco,  
134 a relatively low canopy leaf area and sunny conditions, a C<sub>4</sub> canopy can theoretically achieve  
135 higher total daily rates of photosynthesis than a C<sub>3</sub> at any temperature (37). In this case, the  
136 primary limitation on canopy carbon uptake becomes light-mediated damage during low  
137 temperature extremes (44), although C<sub>4</sub> photosynthesis is energetically expensive. Low  
138 temperature tolerance may be absent from most C<sub>4</sub> species as C<sub>4</sub> photosynthesis evolved in  
139 the tropics (38).

140

141 **Trait combinations of each lineage.** Chloridoideae are distinguished from Andropogoneae in  
142 their occupation of regions with lower precipitation, higher daily variation in temperatures  
143 and longer droughts (Fig. S7). Further, these lineages are differentially associated with fire

144 where Andropogoneae has the shortest fire return interval of 2 years, the peak occurrence of  
145 Chloridoideae is at an interval of 8 years, while in Pooideae the modal fire return interval  
146 exceeds 20 years (Fig. S7). Maximum plant heights of each lineage sort similarly, with values  
147 peaking at 1.5 m for Andropogoneae and 0.6 m for both Chloridoideae and Pooideae (Fig. S7).  
148 However, annual versus perennial life history is not globally relevant. The only significant areas  
149 dominated by annual grasses occurring at the margins of the Sahara Desert and West Africa,  
150 regions commonly considered as over-grazed.

151         80% of burned area globally occurs in the regions we see dominated by  
152 Andropogoneae (20) and differs from other C<sub>4</sub> grass lineages with its greater average height  
153 and consequent rapid growth rates. Where rainfall exceeds 800 mm MAP in the tropics, soils  
154 are typically leached and infertile (45). Andropogoneae produce leaves with relatively high  
155 C:N ratios (46, 47), which resist rapid decomposition. The tall, erect architecture of these  
156 grasses produces a flammable well-connected fuelbed (48) and productive tropical  
157 environments, with an annual dry season of > 5 months (13), are primed to burn as the grass  
158 layer senesces. Experimental manipulations demonstrate that fire promotes dominance by  
159 Andropogoneae (46) and we see this mirrored at a global scale. Grass persistence in these  
160 competitive environments relies on the annual production of a new canopy and, in the  
161 absence of woody investment, dead biomass must either rapidly decompose, burn or be  
162 consumed by herbivores to avoid self-shading (11, 49). Andropogoneae are known to have  
163 morphological adaptations enabling tolerances and persistence to fire that are not commonly  
164 present in other grass lineages (49). Fire and other forms of repeated disturbance, such as  
165 grazing, are therefore crucial for grass-dominated systems to persist in high rainfall  
166 environments. While Andropogoneae appears to be the C<sub>4</sub> lineage most closely associated

167 with disturbance by fire, multiple lineages in the semi-arid African tropics appear linked to  
168 grazing tolerance (Fig S8, (50, 51)), and this may be due to the strength and form of  
169 environmental filtering associated with fire versus grazing, as well as the antiquity and  
170 biogeography of grazing pressure relative to fire.

171

172 **Implications.** The Andropogoneae, Chloridoideae and Pooideae grass lineages dominate  
173 globally, via mechanisms encompassing plant production and competition, resilience to  
174 drought, freezing and disturbance. Why do three of the most diverse grass lineages  
175 characterise grassy biomes? Does diversity beget ecological success or does success beget  
176 diversity? Early diversification may have enabled ecological success, such that ecological  
177 speciation allowed each lineage to radiate across broad environmental envelopes (an  
178 ecological mechanism). Alternatively, a neutral mechanism of a long history of diversification  
179 may have led to high diversity as Andropogoneae and Chloridoideae are the oldest C<sub>4</sub> lineages.  
180 Across our dataset, evidence for this is equivocal. We list 8.8% of all grass species and within  
181 lineages: Andropogoneae, 14.5%; Chloridoideae, 6.5%; Pooideae, 10.8%. Perhaps ecological  
182 success facilitated diversification, such that large geographical ranges enabled by unique  
183 adaptations made the isolation of populations and allopatric speciation more likely (a  
184 geographic mechanism). The rapid spread of the cosmopolitan *Themeda triandra* from Asia to  
185 Africa in < 500,000 years supports this idea (52). Resolving the relative role of these  
186 mechanisms requires comparative phylogenetic analyses of the relationships among ecology,  
187 functional traits, range sizes and diversification rates.

188 The biogeographic contingencies described here in crossover temperatures align with  
189 emerging evidence that regional evolutionary and environmental histories have been

190 important modifiers of biome-climate relationships (9, 53). However, the rapid rates of  
191 dispersal observed in grasses (52), along with their short generation times (49), raises critical  
192 questions about whether the biogeographic contingencies observed in woody plants should  
193 be mirrored in grassy communities.

194         Global change will rapidly modify the existing global distribution of grassy biomes.  
195 First, environmental change can alter feedbacks between grasses and woody plants via  
196 changes in the processes limiting the growth and mortality of woody plants. For example,  
197 rising CO<sub>2</sub> is hypothesised to increase tree recruitment in savannas and forest margins (54,  
198 55), while extreme drought events and warming may cause forest dieback on large scales (56),  
199 where each process has feedbacks with fire leading to ongoing biome shifts (57). Second,  
200 environmental changes will shift the community composition of grass communities. Our  
201 analysis points to globally important ecotones between C<sub>3</sub> and C<sub>4</sub> likely to be influenced by  
202 rising CO<sub>2</sub> and temperature (58), but these are better conceptualised as the boundary  
203 between Pooideae and Chloridoideae in arid and semi-arid regions or regions of high grazing  
204 pressure, and Pooideae and Andropogoneae in wetter regions. An experimental CO<sub>2</sub>  
205 manipulation in dry mixed prairie found elevated CO<sub>2</sub> favoured a Pooideae dominant over a  
206 Chloridoideae dominant, with rising temperature having the opposing effect (59). Conversely,  
207 in a mesic tallgrass prairie, an Andropogoneae dominant displaced a Pooideae dominant in  
208 competition under elevated CO<sub>2</sub> via improved water relations (60). In each case, C<sub>4</sub>  
209 photosynthesis was one trait among many that influenced dynamic environmental responses.  
210 Finally, the boundary between Andropogoneae and Chloridoideae is more likely to be  
211 influenced by changes in rainfall amount and seasonality, along with shifting fire and grazing  
212 regimes that can be directly altered by people at small and large scales.

213

214 **Conclusions.** The previous lack of synthesis in biome limits between grasses and woody plants  
215 constrains our understanding of how ecological and evolutionary processes determine the  
216 sensitivity of vegetation to global change. We have shown that divergent evolutionary  
217 histories and unique functional trait combinations have enabled three major grass lineages to  
218 dominate grassy biomes across global climate space. Local dominance by each lineage brings  
219 differing sensitivities to alternative global change drivers.

220

221 **Acknowledgements.** This research is a product of the National Evolutionary Synthesis Center  
222 (NESCent) working group led by CPO, CAES, and CJS. DG was supported by a NESCent graduate  
223 fellowship and NSF award 1342703. CPO was supported during the preparation of this  
224 manuscript by Natural Environment Research Council grant (NE/I014322/1). Zhiyao Tang  
225 helped to obtain the China map. Nikolai Ermakov and Daoud Rafikpoor provided shape files  
226 of mapping data for Russia and Afghanistan, respectively. Anita Smyth assisted in obtaining  
227 the Aekos data. Les Powrie, and Mike Rutherford assisted in obtaining the plot data from  
228 South Africa. The South African National Biodiversity Institute and the South African  
229 Biodiversity Facility are thanked for the use of data/information supplied by SANBI from  
230 digitized collections. This work forms part of the “The National Vegetation Map” coordinated  
231 by the South African National Biodiversity Institute.

232 **Author Contributions.** CERL, DMG, KJS, TMA, WB, ED, EJF, WH, LM, SP, JR, BS, MS, ES, RW,  
233 and CPO compiled the data. CERL, DMG, KS, DG and TK analysed the data. SA contributed fire  
234 data. CERL and CPO designed the study and wrote the paper with text contributions from DMG  
235 and KJS. All authors contributed comments on a draft of the paper. DMG and CERL perfected  
236 the figures.

## 237 **Methods**

238 **Classifying grassy biomes.** Data from 20 vegetation maps derived from botanical information,  
239 or a combination of botanical and geographic information, were integrated to delineate grassy  
240 biomes (references for these maps are listed in the Supplementary Information). The result  
241 was a global map of grassy biomes resolved into 1,635 discrete vegetation units, each defined  
242 by its characteristic grass species, which formed a list of 1,154 species (accounting for  
243 synonymy) found commonly across global grassy biomes.

244 Vegetation maps are generally based on botanical survey and geographic analysis,  
245 combined with expert input, that cluster species composition and vegetation structure to  
246 define unique vegetation units. We compiled the ground layer information for the vegetation  
247 units in each map to identify the grass species considered to characterize a vegetation unit.  
248 To determine whether vegetation units were naturally dominated by grasses, we developed  
249 a set of criteria. First, artificial vegetation units were defined as those plowed or sown for  
250 agriculture and where humans are planting species that would not otherwise occur. We  
251 retained data for this analysis of only natural formations. Second, based on the vegetation  
252 descriptions we determined whether > 50% of the relative ground cover or biomass was  
253 derived from grasses. We used this definition in place of 'Is there a continuous grassy ground  
254 layer?' because low herbaceous cover in predominantly grassy vegetation would present a  
255 problem with the classification of desertic and arid environments. Vegetation units were  
256 considered grassy deserts where the total above-ground biomass was considered <50 g m<sup>2</sup>,  
257 or where total ground cover <25%, throughout the year. Finally, we retained all formations  
258 where grasses were the dominant component of the ground layer, irrespective of tree cover.  
259 Numerous grassy biomes, such as tropical savannas and woodlands, may be characterised by  
260 up to 80% tree cover, but behave functionally as savannas due to a contiguous grassy ground

261 layer (13, 35). Where necessary, we sourced additional information from published vegetation  
262 descriptions and analyses to attribute key grass species to a grassy vegetation unit.  
263 Additionally, vegetation units could be classified as mosaics with patches of closed canopy  
264 vegetation intermingled with open vegetation, e.g. across the Steppe region of Russia.

265 **Mapping grassy biomes.** The vegetation maps we used as sources were developed  
266 throughout the 20<sup>th</sup> century. While this method provides an incomplete global coverage, we  
267 integrated available state-, country- and continent-level mapping to assemble what we  
268 consider to be the most robust map possible of the limits of grassy vegetation, where both  
269 vegetation characteristics and key constituent species could be identified. We were obliged  
270 to use the WWF Ecoregions map (61) where no other mapping was available. We re-assessed  
271 this global map to re-define units as grassy or not based on the criteria outlined above.

272 To quantify the global limits of grassy vegetation according to grass lineage, we gridded  
273 the mapped data compilation at 0.5 degrees resolution. We calculated the proportion of each  
274 0.5-degree grid cell occupied by grassy polygons. Using the grass phylogenetic and trait  
275 information compiled, we then calculated the occupancy of grassy polygons by photosynthetic  
276 type, annual/perennial life history, grass lineage, and mean maximum grass height. These data  
277 are not the same as a classic concept of abundance or dominance but are a relative measure  
278 of the likelihood of occupancy measured from zero to unity. We undertook a validation of our  
279 map compilation described in the Supplementary Information and in Figure S9.

280 **Phylogenetic and plant trait information.** We cross-referenced our species list to a taxonomy  
281 of accepted scientific names (GrassBase, <http://www.kew.org/data/grasses-syn/cite.htm>)  
282 and a recent accepted phylogeny from the Grass Phylogeny Working Group (25) to eliminate  
283 synonymy and link species to descriptions of evolutionary history and functional traits.  
284 Functional traits considered were: C<sub>3</sub>/C<sub>4</sub> photosynthetic pathway, maximum plant height,



285 annual/perennial life history, and tolerance of climatic extremes and fire frequency. C<sub>3</sub> species  
286 were divided amongst two groups: a polyphyletic group belonging to the PACMAD clade  
287 (including the C<sub>3</sub> sister groups for all C<sub>4</sub> lineages); and the monophyletic BEP clade, a C<sub>3</sub>  
288 outgroup to PACMAD, including bamboos, rice relatives and Pooideae species. C<sub>4</sub> grass species  
289 were attributed to one of 24 independently evolved grass lineages. Maximum plant size is a  
290 major axis of plant trait variation at a global scale (62), with maximum culm height in  
291 herbaceous grasses reflecting annual rates of height growth, as most grasses annually senesce  
292 their canopy (49). Height also describes differences in life history strategies related to light  
293 competition and flammability and grazing tolerance (49). We included annual/perennial as  
294 while most grasses reach sexual maturity in < 1 growing season, perennial grasses can be long-  
295 lived. Plant longevity is an effective strategy for occupying space in competitive environments  
296 (63). We summarized these data for each grassy vegetation unit based on the grass species  
297 listed as characteristic of each unit.

298 For the Poaceae species that we listed, we extracted all available georeferenced  
299 occurrence records from the Global Biodiversity Information Facility (GBIF) web portal  
300 (<http://www.gbif.org/>; accessed January 2014) and cleaned these data to ensure longitude  
301 and latitude values were viable and to two decimal places. Species distributions were  
302 standardised against descriptions of distributions in Grassbase using TDWG regions. For this  
303 subset of species produced via distribution records, median fire return intervals were  
304 calculated at a species level following the methods of Archibald *et al.* 2010 (64). Information  
305 on fire date was extracted for each GBIF location from the MODIS global monthly burnt area  
306 (MCD45A1) satellite data product. To calculate climatic extremes for these same species, the  
307 WorldClim dataset ([www.worldclim.org](http://www.worldclim.org)) was used to obtain species median values of  
308 minimum temperature (BIO6 variable) and seasonal drought length (calculated as the number

309 of successive months where mean annual precipitation was below 30mm). These species level  
310 data were used to construct frequency histograms to examine lineage level variation in fire  
311 regimes and climate extremes (Fig S7).

312 **Environmental data used in global analyses.** Our analysis aimed to elucidate lineage, climate  
313 and disturbance relationships, and whether biogeography impacts the C<sub>3</sub>-C<sub>4</sub> crossover  
314 temperature. We used the WorldClim dataset at a 0.5 degree resolution to match the  
315 vegetation map, and extracted mean annual precipitation (MAP), rainfall seasonality, mean  
316 annual temperature (MAT) and temperature seasonality ([www.worldclim.org](http://www.worldclim.org)). We used a  
317 rainfall concentration index to describe rainfall seasonality based on (35). Growing season  
318 temperature (GST) was calculated for each grid cell to quantify regional and global C<sub>3</sub>-C<sub>4</sub>  
319 crossover temperatures. GST was calculated as the mean temperature across months with a  
320 greater than or equal to 5 degree mean temperature and at least 25 mm rainfall, and was  
321 calculated using WorldClim monthly climate normals (65).

322 A median fire return interval (FRI) is the number of years between fire events that  
323 represents the time period available for plants to grow. We used fire interval data from the  
324 16 year MODIS fire datasets to fit Weibull distributions to 0.5° gridded data for the globe by  
325 using the method outlined in Archibald *et al.* 2010 (64). Tropical grasslands and savannas have  
326 the world's shortest fire return times, due to rapid rates of fuel accumulation and a climate  
327 that supports frequent fire (annual dry seasons, warm climate and reliably seasonal rainfall)  
328 (20). Our dataset of estimated fire return times, while spatially biased, is therefore robust for  
329 grassy biomes.

330 Globally consistent data on present or past herbivore pressures are simply not  
331 available. We were obliged to restrict our analyses to Africa where efforts have been made to  
332 map mammalian herbivore pressures of both wildlife and livestock (66). We combined

333 herbivore and fire data to assess links between lineage composition and disturbance. Soils  
334 data are not of sufficient quality to be meaningfully incorporated in analyses of this scale,  
335 despite being known to mediate local scale vegetation patterns (35). In our global analyses,  
336 we excluded grassy vegetation units defined as flooded, saline or edaphic, where the limits of  
337 these units are generally decoupled from climate.

338 **Analyses.** First, we mapped the distribution of grassy biomes in geographic space according  
339 to lineage and photosynthetic type to calculate the land area occupied by different grass  
340 lineages in a “rank-abundance” style (Fig. 1). Grassy biome distributions were aligned with  
341 MAT (in 1°C intervals) and MAP (in 100 mm intervals) to construct “Whittaker” style plots of  
342 the limits of grassy biomes and of C<sub>3</sub> and C<sub>4</sub> photosynthetic types (Figure 2). These data were  
343 further decomposed to represent the climate space of 17 grass lineages including Pooideae  
344 that dominate grasslands (Figure S4). Data were also analysed by climate intervals of MAT and  
345 MAP to calculate the proportion of grassy land area occupied by each grass lineage within  
346 each climate interval, to consider the potential for deterministic links between climate and  
347 biomes (Figs. S3-S4).

348 Generalised additive models relating the distribution of lineages to growing season  
349 temperature, MAT and MAP across continents were fitted using the mgcv R package and the  
350 function predict.gam (67). Crossover temperatures plus standard deviations were calculated  
351 based on the temperature at which the predicted abundance of C<sub>4</sub> dominance reached 50%.

352 Random forest regressions ([https://cran.r-](https://cran.r-project.org/web/packages/randomForest/randomForest.pdf)  
353 [project.org/web/packages/randomForest/randomForest.pdf](https://cran.r-project.org/web/packages/randomForest/randomForest.pdf)) were used to examine the  
354 climate niche of key grass lineages and to infer correlations between four key climate  
355 predictors (MAP, MAT, temperature seasonality and rainfall seasonality). Models were  
356 constructed for six groups of interest: the C<sub>3</sub> BEP, PACMAD and Pooideae lineages; and the

357 independent C<sub>4</sub> lineages Andropogoneae, Chloridoideae and MPC (Melinidinae + Panicinae +  
358 Cenchrinae) (25). Model fit was checked via a mean of squared residual test. The relative  
359 importance of each environmental correlate was computed with a mean decrease of accuracy  
360 test. The computed coverage response plots for each grass group was an adaptation of the  
361 evaluation strip method developed by (68). These plots demonstrate the non-linear  
362 relationships between environmental gradients and the various grass lineages. To produce  
363 these plots, an environmental dataset was simulated where the focal environmental variable  
364 is varied over its full environmental range and where, for each interval, the observed median  
365 of each of other environmental variables (median over areas where the focus environmental  
366 variable is within the interval) is returned. The displayed curve in each case is the prediction  
367 of our Regression Random Forest model over this simulated dataset. The process used bi-  
368 variate response curves, where two variables rather than one vary simultaneously. The 90<sup>th</sup>  
369 quantile of a kernel density function (function kde2d from the R package ade4) was used to  
370 plot limits of grass lineages relative to herbivore abundance and fire frequency.

371

372 **List of figures in main text**

373

374 **Figure 1.** Global distributions of grassy biomes and dominant grass lineages.

375

376 **Figure 2.** Grassy biomes in global climate space.

377

378 **Figure 3.** Continental disjunctions in lineage-growing season temperature relations.

379

380 **Figure 4.** Global relationships between rainfall, fire and height.

381 **Figure 1: Global distributions of grassy biomes and dominant grass lineages.** A. Grassy  
 382 biomes coded by the C<sub>4</sub> and C<sub>3</sub> grass lineages dominating each vegetation formation. B.  
 383 Relationships among the dominant C<sub>4</sub> grass lineages, with colours matching those used on the  
 384 map. The phylogeny is based on (25) and for simplicity excludes C<sub>3</sub> PACMAD sister clades. C.  
 385 Rank-abundance curve for C<sub>4</sub> and C<sub>3</sub> grass lineages at the global scale, ordered by the  
 386 proportion of the terrestrial surface dominated by each lineage.

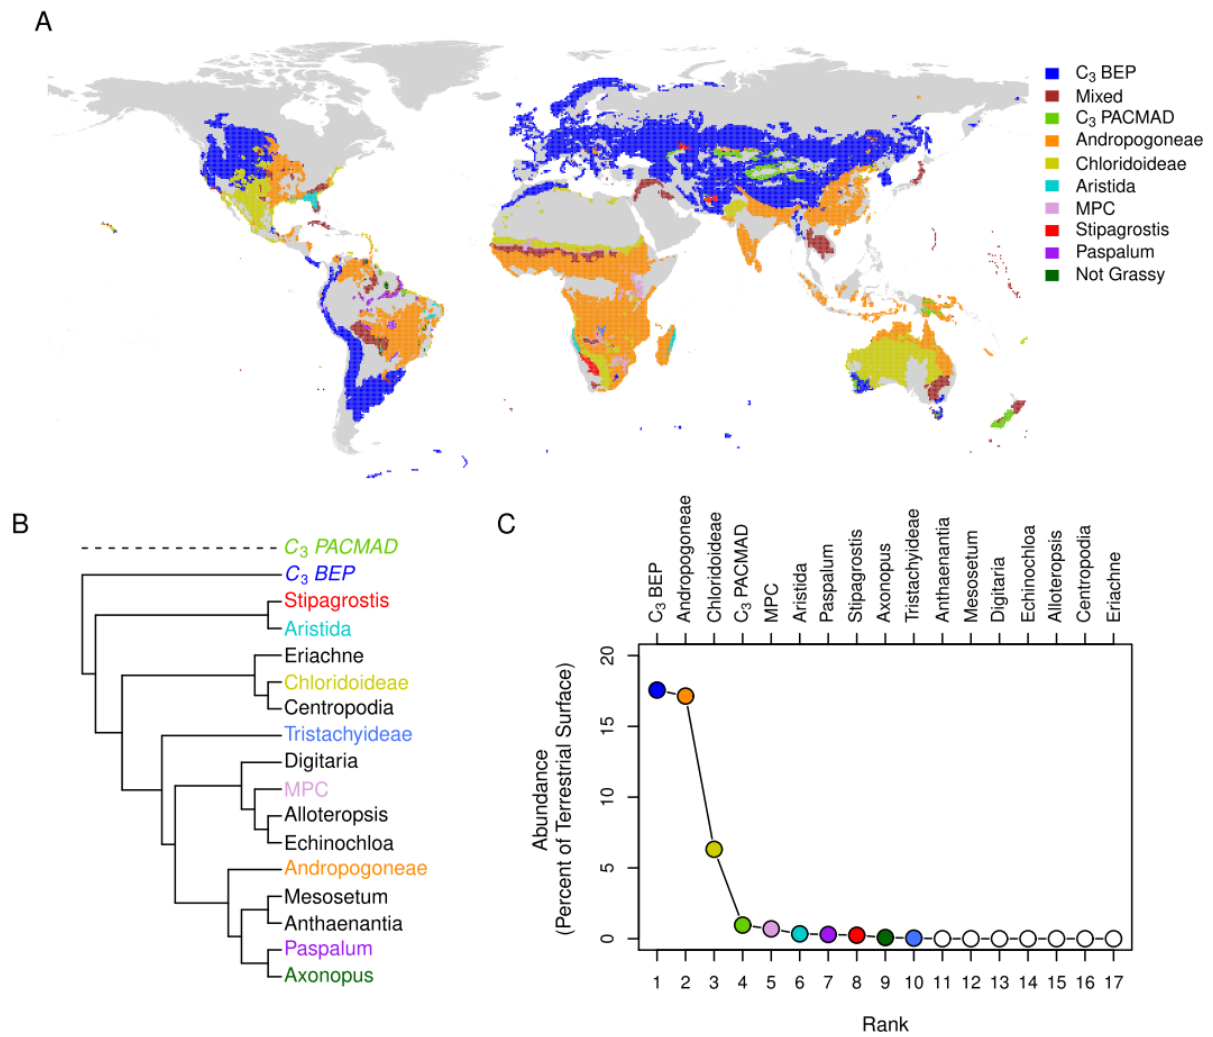

387

388 **Figure 2: Grassy biomes in global climate space.** Based on data at a 0.5-degree resolution,  
389 where data has been binned in 1° mean annual temperature (MAT) and 100 mm mean annual  
390 precipitation (MAP) intervals. Colour ramp shows the relative proportion of the global climate  
391 space for that MAP x MAT bin occupied by grassy biomes. Grey shading represents the  
392 vegetated land area. Data shown here link to Figure S1 showing the total vegetated land area  
393 within each climate interval.

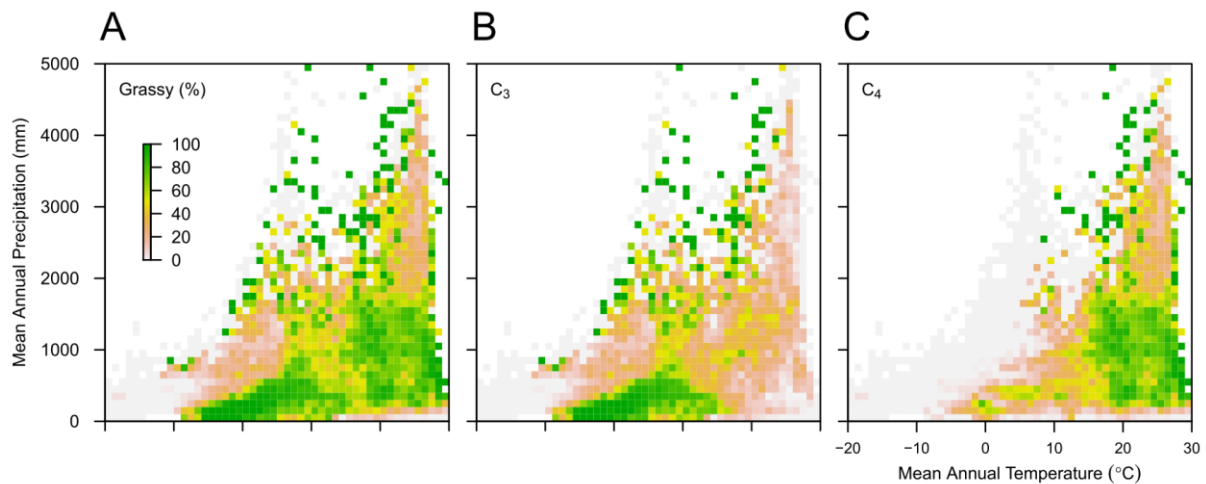

394

395 **Fig. 3. Continental disjunctions in lineage-growing season temperature relationships.** The  
396 distribution of grass lineages relative to growing season temperature (GST) in degrees Celsius  
397 globally (top panel) and then showing the variation in estimated C<sub>3</sub>-C<sub>4</sub> crossover temperatures  
398 by geographic realm. Distributions was fitted using generalized additive models and the  
399 crossover temperature calculated as the point where modelled C<sub>4</sub> grass abundance is 50%,  
400 based on the mapping in Figure 1. The fitted lines and confidence intervals are shown in  
401 different colours for each lineage, with the legend on the figure.



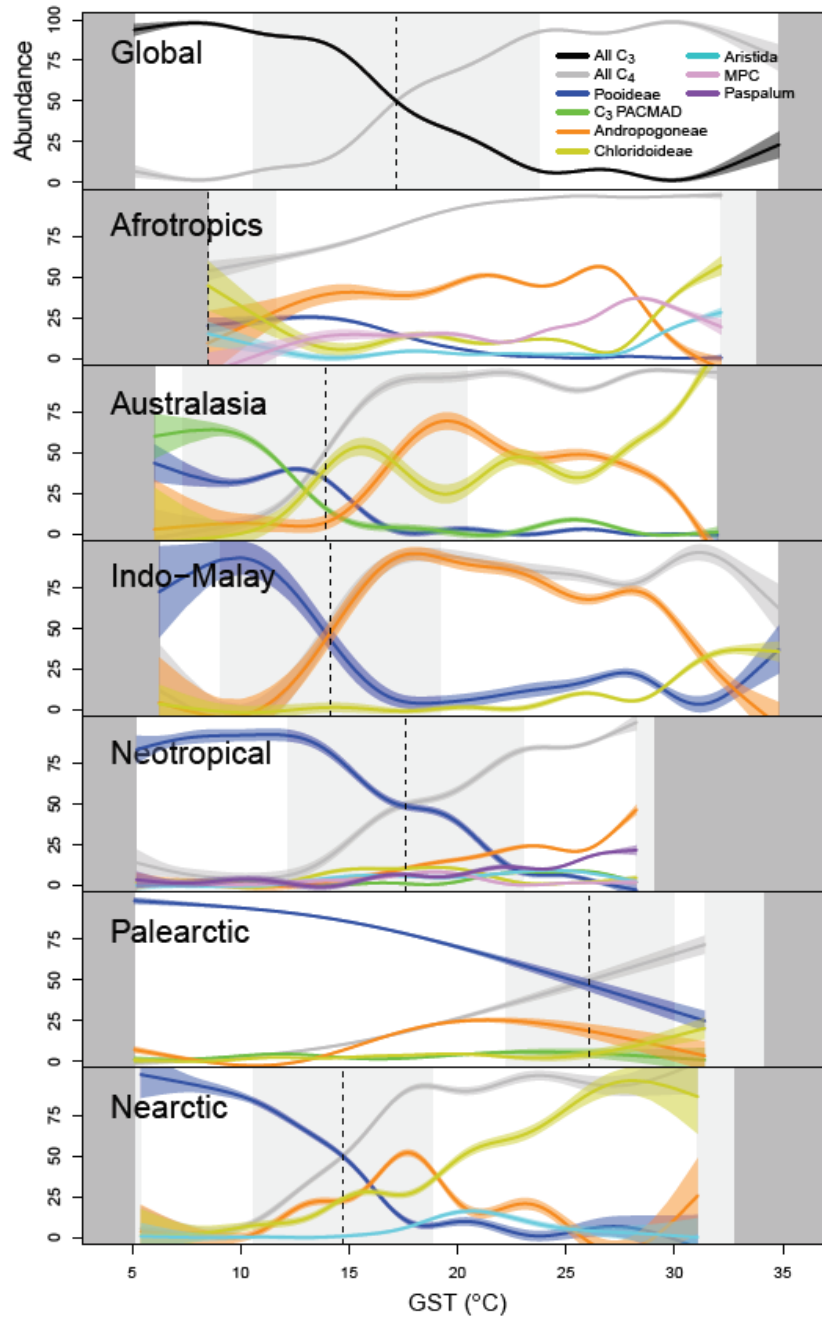

402

403 **Figure 4. Global relationships between rainfall, fire and grass lineages.** The global  
404 relationships of grass lineage abundance relative to MAP using a generalised additive model,  
405 showing 95% confidence intervals. The right-hand axis is the global relationship between fire  
406 return interval and MAP for grassy biomes and is inverted to reflect the inverse relationship  
407 with MAP. The global peak in fire activity coincides with the global peak in dominance of  
408 *Andropogoneae* grassy biomes. In contrast longer fire return times are associated with  
409 dominance by *Pooideae* and *Chloridoideae*.

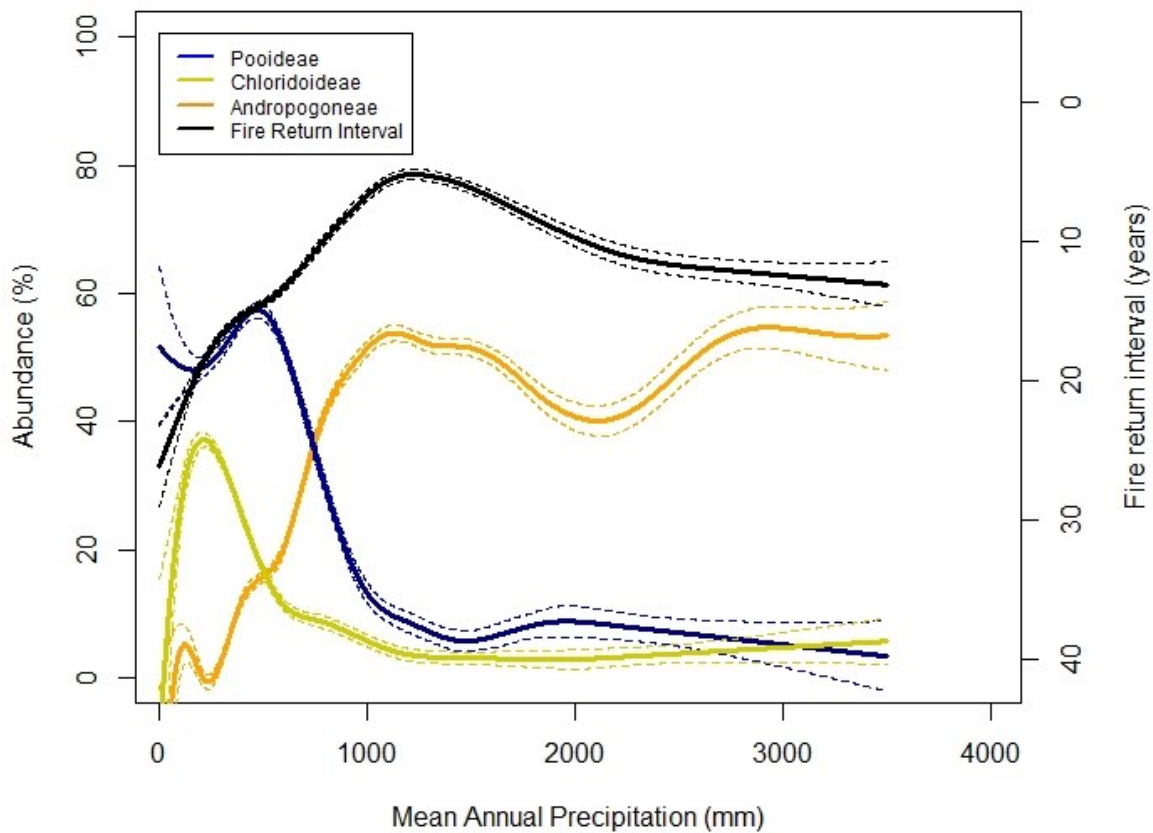

410

411

## 412 References

- 413 1. Carvalhais N, *et al.* (2014) Global covariation of carbon turnover times with climate in  
414 terrestrial ecosystems. *Nature* 514(7521):213-217.
- 415 2. Randerson JT, *et al.* (2015) Multicentury changes in ocean and land contributions to  
416 the climate-carbon feedback. *Global Biogeochemical Cycles* 29(6):744-759.
- 417 3. Searchinger TD, *et al.* (2015) High carbon and biodiversity costs from converting  
418 Africa's wet savannahs to cropland. *Nature Clim. Change* 5(5):481-486.
- 419 4. Bastin J-F, *et al.* (2017) The extent of forest in dryland biomes. *Science* 356(6338):635-  
420 638.
- 421 5. Dexter KG, *et al.* (2015) Floristics and Biogeography of Vegetation in Seasonally Dry  
422 Tropical Regions. *International Forestry Review* 17(S2):10-32.
- 423 6. Slik JWF, *et al.* (2018) Phylogenetic classification of the world's tropical forests. *PNAS*  
424 115(8):1837-1842.
- 425 7. Pausas JG & Bond WJ (2018) Humboldt and the reinvention of nature. *J. Ecology*  
426 [doi.org/10.1111/1365-2745.13109](https://doi.org/10.1111/1365-2745.13109).
- 427 8. Archibald S, *et al.* (2018) Biological and geophysical feedbacks with fire in the Earth  
428 system. *Environmental Research Letters* 13(3):033003.
- 429 9. Lehmann CER, *et al.* (2014) Savanna Vegetation-Fire-Climate Relationships Differ  
430 Among Continents. *Science* 343(6170):548-552.
- 431 10. Hoffmann WA, *et al.* (2012) Ecological thresholds at the savanna-forest boundary: how  
432 plant traits, resources and fire govern the distribution of tropical biomes. *Ecology*  
433 *Letters* 15(7):759-768.
- 434 11. Bond WJ (2008) What Limits Trees in C4 Grasslands and Savannas? *Annual Review of*  
435 *Ecology, Evolution, and Systematics* 39(1):641-659.
- 436 12. Lloyd J, *et al.* (2008) Contributions of woody and herbaceous vegetation to tropical  
437 savanna ecosystem productivity: a quasi-global estimate. *Tree Physiology* 28(3):451-  
438 468.
- 439 13. Ratnam J, *et al.* (2011) When is a 'forest' a savanna, and why does it matter? *Global*  
440 *Ecology and Biogeography* 20(5):653-660.
- 441 14. Edwards EJ, Osborne CP, Stromberg CAE, Smith SA, & C4 Grasses Consortium (2010)  
442 The Origins of C4 Grasslands: Integrating Evolutionary and Ecosystem Science. *Science*  
443 328(5978):587-591.
- 444 15. Strömberg CAE (2011) Evolution of Grasses and Grassland Ecosystems. *Annual Review*  
445 *of Earth and Planetary Sciences* 39(1):517-544.
- 446 16. Cerling TE (1997) Global vegetation change through the Miocene/Pliocene boundary.  
447 *Nature* 389:153-158.
- 448 17. Cerling TE, *et al.* (2011) Woody cover and hominin environments in the past  
449 6[thinsp]million years. *Nature* 476(7358):51-56.
- 450 18. Wynn JG, *et al.* (2013) Diet of Australopithecus afarensis from the Pliocene Hadar  
451 Formation, Ethiopia. *PNAS* 110(26):10495-10500.
- 452 19. Lehmann CER & Parr CL (2016) Tropical grassy biomes: linking ecology, human use and  
453 conservation. *Phil. Trans. R. Soc. B* 371(1703).
- 454 20. Archibald S, Lehmann CER, Gomez-Dans J, & Bradstock RA (2013) Defining pyromes  
455 and global syndromes of fire. *PNAS* 10(16):6442 - 6447.

- 456 21. Ehleringer JR, Cerling TE, & Helliker BR (1997) C<sub>4</sub> photosynthesis, Atmospheric CO<sub>2</sub>, and  
457 climate. *Oecologia* 112(3):285-299.
- 458 22. Collatz GJ, Berry JA, & Clark JS (1998) Effects of climate and atmospheric CO<sub>2</sub> partial  
459 pressure on the global distribution of C<sub>4</sub> grasses: present, past, and future. *Oecologia*  
460 V114(4):441-454.
- 461 23. Still CJ, Berry JA, Collatz GJ, & DeFries RS (2003) Global distribution of C<sub>3</sub> and C<sub>4</sub>  
462 vegetation: Carbon cycle implications. *Global Biogeochem. Cycles* 17(1).
- 463 24. Woodward F, Lomas M, & Kelly C (2004) Global climate and the distribution of plant  
464 biomes. *Phil. Trans. R. Soc. B* 359(1450):1465-1476.
- 465 25. Grass Phylogeny Working G, II (2012) New grass phylogeny resolves deep evolutionary  
466 relationships and discovers C<sub>4</sub> origins. *New Phytologist* 193(2):304-312.
- 467 26. Christin P-A & Osborne CP (2013) The recurrent assembly of C<sub>4</sub> photosynthesis, an  
468 evolutionary tale. *Photosynthesis Research* 117(1):163-175.
- 469 27. Taub DR (2000) Climate and the US distribution of C<sub>4</sub> grass subfamilies and  
470 decarboxylation variants of C<sub>4</sub> photosynthesis. *American Journal of Botany*  
471 87(8):1211-1215.
- 472 28. Liu H, Edwards EJ, Freckleton RP, & Osborne CP (2012) Phylogenetic niche  
473 conservatism in C<sub>4</sub> grasses. *Oecologia* 170(3):835-845.
- 474 29. Dixon AP, Faber-Langendoen D, Josse C, Morrison J, & Loucks CJ (2014) Distribution  
475 mapping of world grassland types. *J. Biogeog.* 41(11):2003-2019.
- 476 30. Griffith DM, *et al.* (2017) Comment on “The extent of forest in dryland biomes”.  
477 *Science* 358(6365):eaao1309.
- 478 31. Solofondranohatra CL, *et al.* (2018) Grass Functional Traits Differentiate Forest and  
479 Savanna in the Madagascar Central Highlands. *Frontiers in Ecology and Evolution*  
480 6(184).
- 481 32. Smith MD & Knapp AK (2003) Dominant species maintain ecosystem function with  
482 non-random species loss. *Ecology Letters* 6(6):509-517.
- 483 33. Winfree R, Fox J, Williams NM, Reilly JR, & Cariveau DP (2015) Abundance of  
484 common species, not species richness, drives delivery of a real-world ecosystem  
485 service. *Ecology Letters* 18(7):626-635.
- 486 34. Staver AC, Archibald S, & Levin SA (2011) The Global Extent and Determinants of  
487 Savanna and Forest as Alternative Biome States. *Science* 334(6053):230-232.
- 488 35. Lehmann CER, Archibald SA, Hoffmann WA, & Bond WJ (2011) Deciphering the  
489 distribution of the savanna biome. *New Phytologist* 191(1):197-209.
- 490 36. Sandve SR & Fjellheim S (2010) Did gene family expansions during the Eocene–  
491 Oligocene boundary climate cooling play a role in Pooideae adaptation to cool  
492 climates? *Molecular Ecology* 19(10):2075-2088.
- 493 37. McKeown M, Schubert M, Marcussen T, Fjellheim S, & Preston JC (2016) Evidence for  
494 an early origin of vernalization responsiveness in temperate Pooideae grasses. *Plant*  
495 *physiology* 172(1):416-426.
- 496 38. Edwards EJ & Smith SA (2010) Phylogenetic analyses reveal the shady history of C<sub>4</sub>  
497 grasses. *PNAS* 107(6):2532-2537.
- 498 39. Osborne CP & Freckleton RP (2009) Ecological selection pressures for C<sub>4</sub>  
499 photosynthesis in the grasses. *Proceedings of the Royal Society B: Biological Sciences*  
500 276(1663):1753-1760.
- 501 40. Teeri J & Stowe L (1976) Climatic patterns and the distribution of C<sub>4</sub> grasses in North  
502 America. *Oecologia* 23(1):1-12.

- 503 41. Young HJ & Young TP (1983) Local distribution of C<sub>3</sub> and C<sub>4</sub> grasses in sites of overlap  
504 on Mount Kenya. *Oecologia* 58(3):373-377.
- 505 42. Griffith DM, *et al.* (2015) Biogeographically distinct controls on C<sub>3</sub> and C<sub>4</sub> grass  
506 distributions: merging community and physiological ecology. *Global Ecology and*  
507 *Biogeography* 24(3):304-313.
- 508 43. Ehleringer JR (1978) Implications of quantum yield differences on the distributions of  
509 C<sub>3</sub> and C<sub>4</sub> grasses. *Oecologia* 31(3):255-267.
- 510 44. Long SP (1999) Environmental responses. *C<sub>4</sub> plant biology*:215-249.
- 511 45. Högborg P (1982) Mycorrhizal associations in some woodland and forest trees and  
512 shrubs in Tanzania. *New Phytologist* 92(3):407-415.
- 513 46. Forrestel EJ, Donoghue MJ, & Smith MD (2014) Convergent phylogenetic and  
514 functional responses to altered fire regimes in mesic savanna grasslands of North  
515 America and South Africa. *New Phytologist* 203(3):1000-1011.
- 516 47. Taylor SH, *et al.* (2010) Ecophysiological traits in C<sub>3</sub> and C<sub>4</sub> grasses: a phylogenetically  
517 controlled screening experiment. *New Phytologist* 185(3):780-791.
- 518 48. Simpson KJ, *et al.* (2016) Determinants of flammability in savanna grass species. *J.*  
519 *Ecology* 104(1):138-148.
- 520 49. Linder H, Lehmann CE, Archibald S, Osborne CP, & Richardson DM (2018) Global grass  
521 (Poaceae) success underpinned by traits facilitating colonization, persistence and  
522 habitat transformation. *Biological Reviews* 93(2):1125-1144.
- 523 50. Forrestel EJ, *et al.* (2017) Different clades and traits yield similar grassland functional  
524 responses. *PNAS* 201(6):129-09.
- 525 51. Anderson TM, Shaw J, & Olff H (2011) Ecology's cruel dilemma, phylogenetic trait  
526 evolution and the assembly of Serengeti plant communities. *J. Ecology* 99(3):797-806.
- 527 52. Dunning LT, *et al.* (2017) The recent and rapid spread of *Themeda triandra*. *Botany*  
528 *Letters*.
- 529 53. Rogers BM, Soja AJ, Goulden ML, & Randerson JT (2015) Influence of tree species on  
530 continental differences in boreal fires and climate feedbacks. *Nature Geoscience*  
531 8(3):228.
- 532 54. Bond WJ & Midgley GF (2000) A proposed CO<sub>2</sub>-controlled mechanism of woody plant  
533 invasion in grasslands and savannas. *Global Change Biology* 6(8):865-869.
- 534 55. Stevens N, Lehmann CER, Murphy BP, & Durigan G (2017) Savanna woody  
535 encroachment is widespread across three continents. *Glob. Change Biol* 23(1):235-  
536 244.
- 537 56. Van Mantgem PJ, *et al.* (2009) Widespread increase of tree mortality rates in the  
538 western United States. *Science* 323(5913):521-524.
- 539 57. Osborne CP, *et al.* (2018) Human impacts in African savannas are mediated by plant  
540 functional traits. *New Phytologist*.
- 541 58. Ehleringer JR (2005) The influence of atmospheric CO<sub>2</sub>, temperature, and water on the  
542 abundance of C<sub>3</sub>/C<sub>4</sub> taxa. *A history of atmospheric CO<sub>2</sub> and its effects on plants,*  
543 *animals, and ecosystems* (Springer), pp 214-231.
- 544 59. Morgan JA, *et al.* (2011) C<sub>4</sub> grasses prosper as carbon dioxide eliminates desiccation in  
545 warmed semi-arid grassland. *Nature* 476(7359):202.
- 546 60. Owensby CE, Ham JM, Knapp AK, & Auen LM (1999) Biomass production and species  
547 composition change in a tall grass prairie ecosystem after long-term exposure to  
548 elevated atmospheric CO<sub>2</sub>. *Glob. Change Biol* 5:497.

- 549 61. Olson DM, *et al.* (2001) Terrestrial Ecoregions of the World: A New Map of Life on Earth  
550 A new global map of terrestrial ecoregions provides an innovative tool for conserving  
551 biodiversity. *BioScience* 51(11):933-938.
- 552 62. Díaz S, *et al.* (2016) The global spectrum of plant form and function. *Nature*  
553 529(7585):167.
- 554 63. Raven J & Thomas H (2010) Grasses. *Current Biology* 20(19):R837-R839.
- 555 64. Archibald S, Scholes R, Roy DP, Roberts G, & Boschetti L (2010) Southern African fire  
556 regimes as revealed by remote sensing. *Int. J. Wildland Fire* 19(7):861-878.
- 557 65. Fick SE & Hijmans RJ (2017) WorldClim 2: new 1-km spatial resolution climate surfaces  
558 for global land areas. *Int. J. Climatology* 37(12):4302-4315.
- 559 66. Hempson GP, Archibald S, & Bond WJ (2015) A continent-wide assessment of the form  
560 and intensity of large mammal herbivory in Africa. *Science* 350(6264):1056-1061.
- 561 67. Wood S (2011) Mixed GAM Computation Vehicle with GCV/AIC/REML smoothness  
562 estimation and GAMMs by REML/PQL.
- 563 68. Elith J, Ferrier S, Huettmann F, & Leathwick J (2005) The evaluation strip: a new and  
564 robust method for plotting predicted responses from species distribution models.  
565 *Ecological modelling* 186(3):280-289.

566

567

568 **Supplementary Figures, Tables and Information for:**

569 **Functional diversification enabled grassy biomes to fill global climate space**

570

571 Authored by: Caroline E. R. Lehmann, Daniel M. Griffith, Kimberley J. Simpson, T. Michael

572 Anderson, Sally Archibald, David J. Beerling, William J. Bond, Elsie Denton, Erika J. Edwards,

573 Elisabeth J. Forrestel, David L. Fox, Damien Georges, William A. Hoffmann, Thomas Kluyver,

574 Ladislav Mucina, Stephanie Pau, Jayashree Ratnam, Nicolas Salamin, Bianca Santini, Melinda

575 D. Smith, Elizabeth L. Spriggs, Rebecca Westley, Christopher J. Still, Caroline A.E. Strömberg

576 and Colin P. Osborne

577

578 **Contents**

579 1. Description of map compilation validation

580 2. Supplementary Figures 1 - 9

581 3. Table of land area of different lineages according to different projections

582 4. References to dataset development

583 a. References to vegetation maps and associated information

584 b. References for plot data for map validation

585

## 586 **Development and validation of map compilation**

587 Rarely, if ever, has this rich body of vegetation mapping research been integrated with Earth  
588 system science or evolutionary studies. This is perhaps because vegetation mapping is  
589 considered a descriptive natural science in an age of big data. The contiguous land mass  
590 covering the countries of China, Mongolia, the former Soviet Union, Afghanistan, Turkey and  
591 Europe are represented by detailed botanical data. The regions of Africa, North America,  
592 Mexico, Panama, Venezuela, Brazil, Argentina, Papua New Guinea, Indonesia, northern and  
593 western Australia are also well documented by botanical data. However, there is a general  
594 paucity of adequate vegetation mapping available across India, South-East Asia (Burma,  
595 Thailand, Laos, and Vietnam), Central America, and parts of South America (Chile, Peru,  
596 Bolivia, Uruguay, Paraguay, Ecuador, and Columbia). It is worth noting that given anticipated  
597 impacts of global change on the distribution and dynamics of vegetation, an absence of  
598 publicly available vegetation mapping for key regions such as South East Asia and the Andes  
599 should be of concern to many.

600

601 We undertook a validation process between plot data describing *in situ* grass abundance and  
602 our global species list. Using publicly available data that intersected with vegetation unit  
603 descriptions we found that, at the level of independent evolutionary lineages of grasses (i.e.,  
604 subfamily), we had strong confidence in the geographic and environmental relationships we  
605 elucidate here (Fig. S9). To validate the classification of common grass species across regions,  
606 we compared the species list in each vegetation unit to a plot level database developed for  
607 validation purposes (Fig. S9). Plot data were sourced from the literature and vegetation  
608 databases and assembled by the authors (see references in the Supplementary Information).



609 110 vegetation units contained enough plot level data for validation analyses. To determine  
610 what taxonomic levels agree with plot data, the comparison was conducted at the species and  
611 subfamily levels. We also examined the agreement of our map and plot datasets at a  
612 functional level by comparing the attribution of photosynthetic type. From the 507 common  
613 grass species across these vegetation units, 88% of these species were present in the plot  
614 dataset of those appropriate vegetation types. This is a very high degree of overlap in species  
615 in our mapping classifications and plot data, especially considering the difference in scale  
616 between local species plots and large vegetation units. Furthermore, we found that vegetation  
617 types generally had similar percentages of characteristic grass species represented in their  
618 plot datasets, although the agreement was worse for particularly large and broadscale  
619 vegetation units. To validate the higher taxonomic classifications and plant functional type  
620 classifications of our map units, we compared the proportion each classification in plots  
621 (weighted by abundance) to the proportion of that classification in our map. Because these  
622 data are on the interval (0,1) we used beta regression to model this relationship. Beta  
623 regression can be interpreted much like logistic regression, except that it allows continuous  
624 values in the dependent variable. Proportions of Poaceae subfamilies and functional types  
625 showed that plot values were strongly predictive of classified values in our map (Fig. S9).

626

627 **Figure S1: Global distribution of grassy biomes.** The global map was derived as a composite  
628 from national and regional maps of vegetation that was gap-filled using the Ecoregions map  
629 (see Methods in the main text and references for all maps at the end of the Supplementary  
630 Information). Coloured areas show the extent of grassy biomes globally and dominance of  
631 these by C<sub>3</sub> grasses and C<sub>4</sub> grasses mapped at the scale of identified vegetation units (i.e.,  
632 polygons). Red = High proportion of C<sub>4</sub> grasses. Blue = High proportion C<sub>3</sub> grasses. Datum:  
633 WGS84.  
634

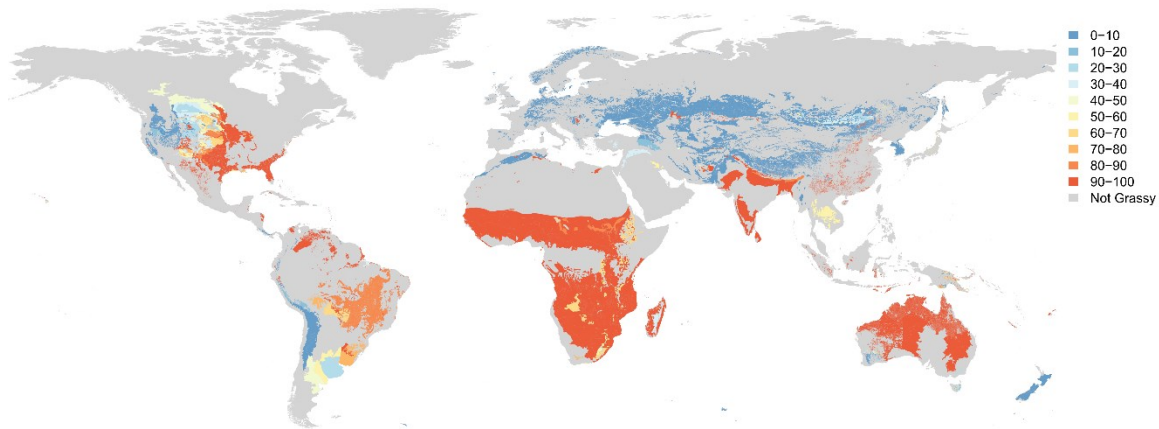

635  
636

637 **Figure S2. Global vegetated land area as related to Mean annual temperature and mean**  
638 **annual precipitation.** Mean annual precipitation is in 100 mm bins, while temperature is in  
639 1oC bins. The color ramp represents the number of 0.5 degree points in 100mm x 1oc unit of  
640 climate space. Note the grey background that highlights the global extent of climate space  
641 where these temperature – precipitation combinations are essentially rare on the vegetated  
642 land surface. The color ramp from dark blue to purple represents an increasing density of  
643 points in a given climate bin.  
644

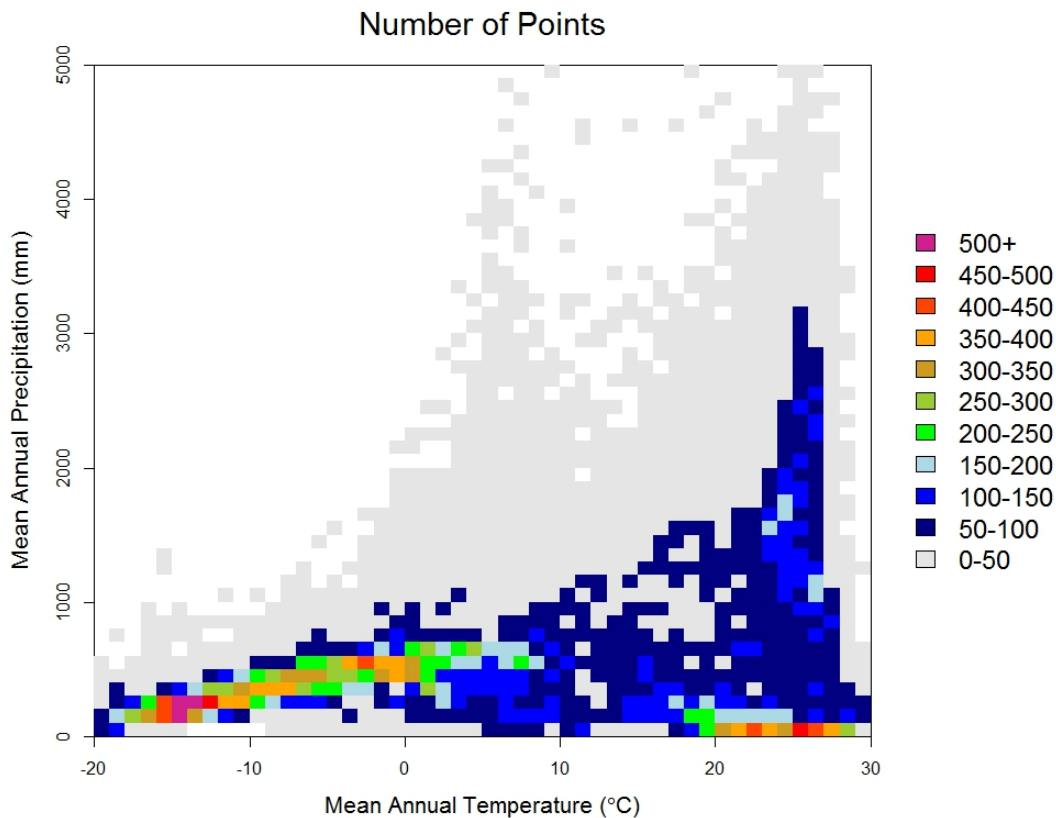

645

646

647

648

649 **Figure S3: Global abundance of the main grass lineages by temperature and rainfall.** Colour  
650 scale indicates the proportion of 0.5° grid squares dominated by each lineage at the global  
651 scale for each of (A) mean annual temperature and (B) Mean annual precipitation. These plots  
652 demonstrate that, in cool, dry regions where the C3 Pooideae lineage is concentrated, it tends  
653 to be the only grass lineage present, and this lineage dominates that climate space. These can  
654 be considered as deterministic grasslands. In contrast, the heterogeneity of the dominance of  
655 C<sub>4</sub> Andropogoneae and C<sub>4</sub> Chloridoideae lineages across climate space could suggest that the  
656 grassy biomes where these lineages are found are not deterministic, and dominance may be  
657 driven by processes other than climate.

658 **A. Dominance by mean annual temperature**

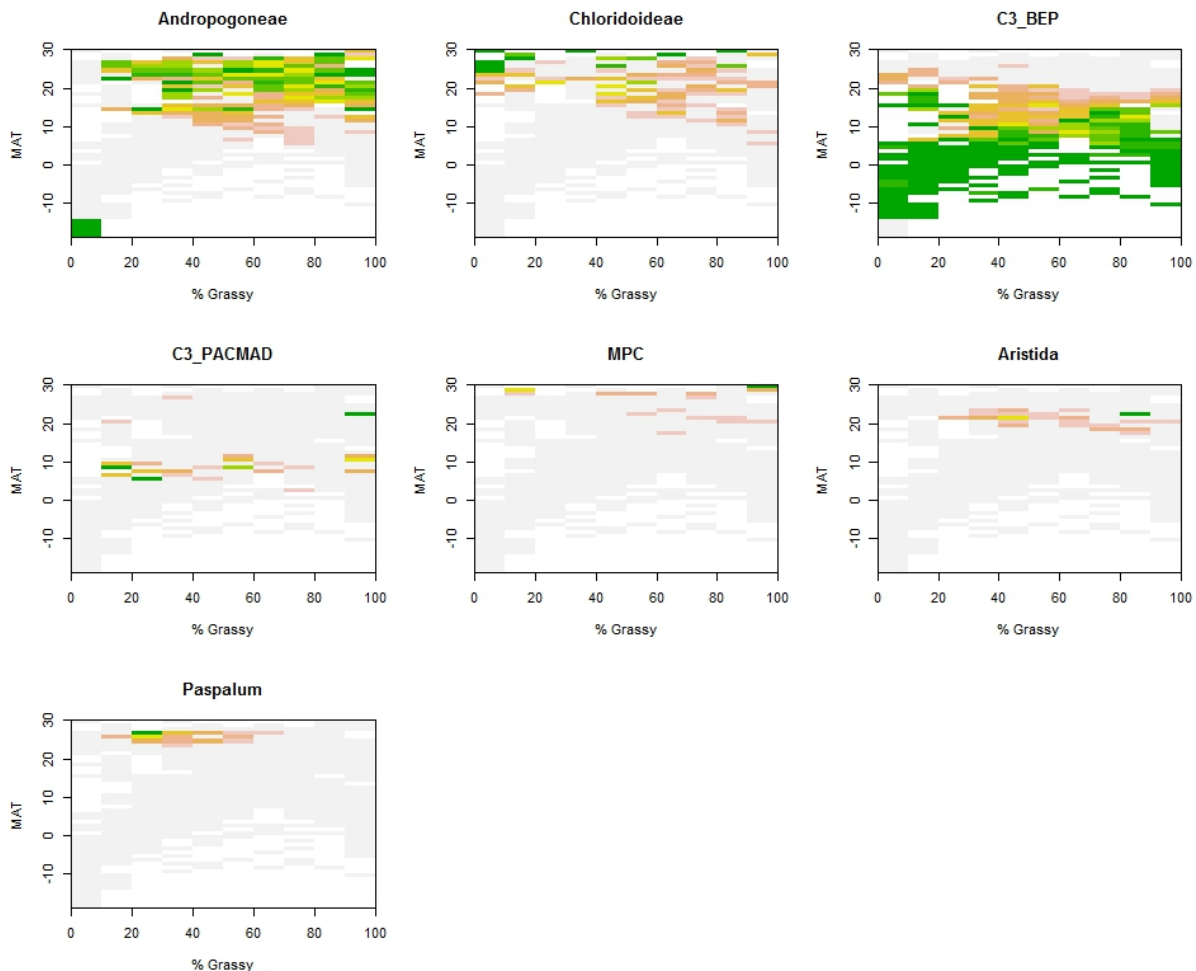

659

660

## B. Dominance by mean annual precipitation

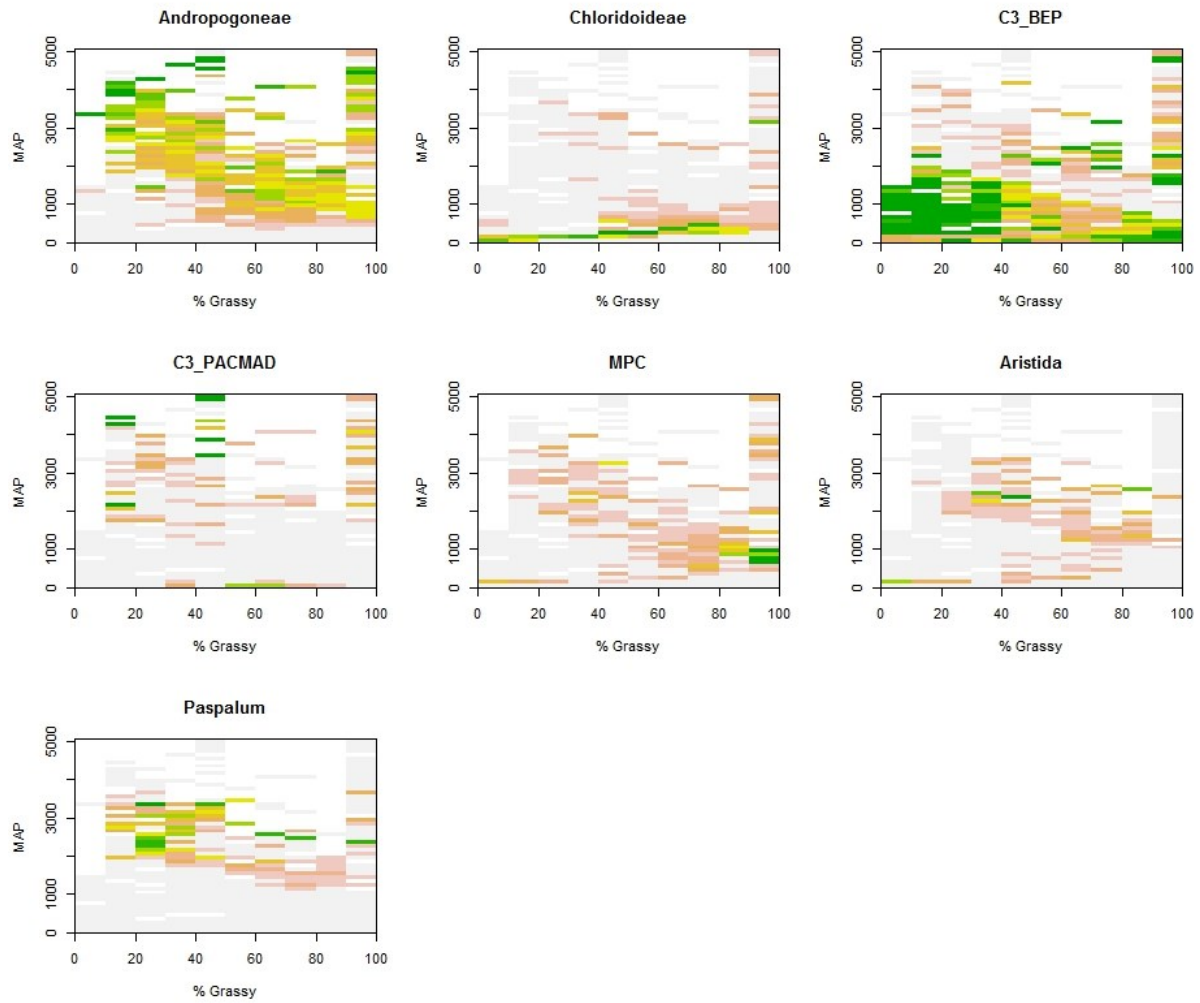

661

662

663 **Figure S4: Concentration of 17 grass lineages in climate space.** This figure builds on S1 – S2  
664 by again highlighting the climate space characterised by different grass lineages. It is very clear  
665 that C3 PACMAD dominance is highly restricted to warmer wetter parts of climate and we  
666 know from S1 that geographically these combinations of temperature and precipitation are  
667 limited. These figures also again highlight the wide distribution of Pooideae, Andropogoneae  
668 and Chloridoideae.

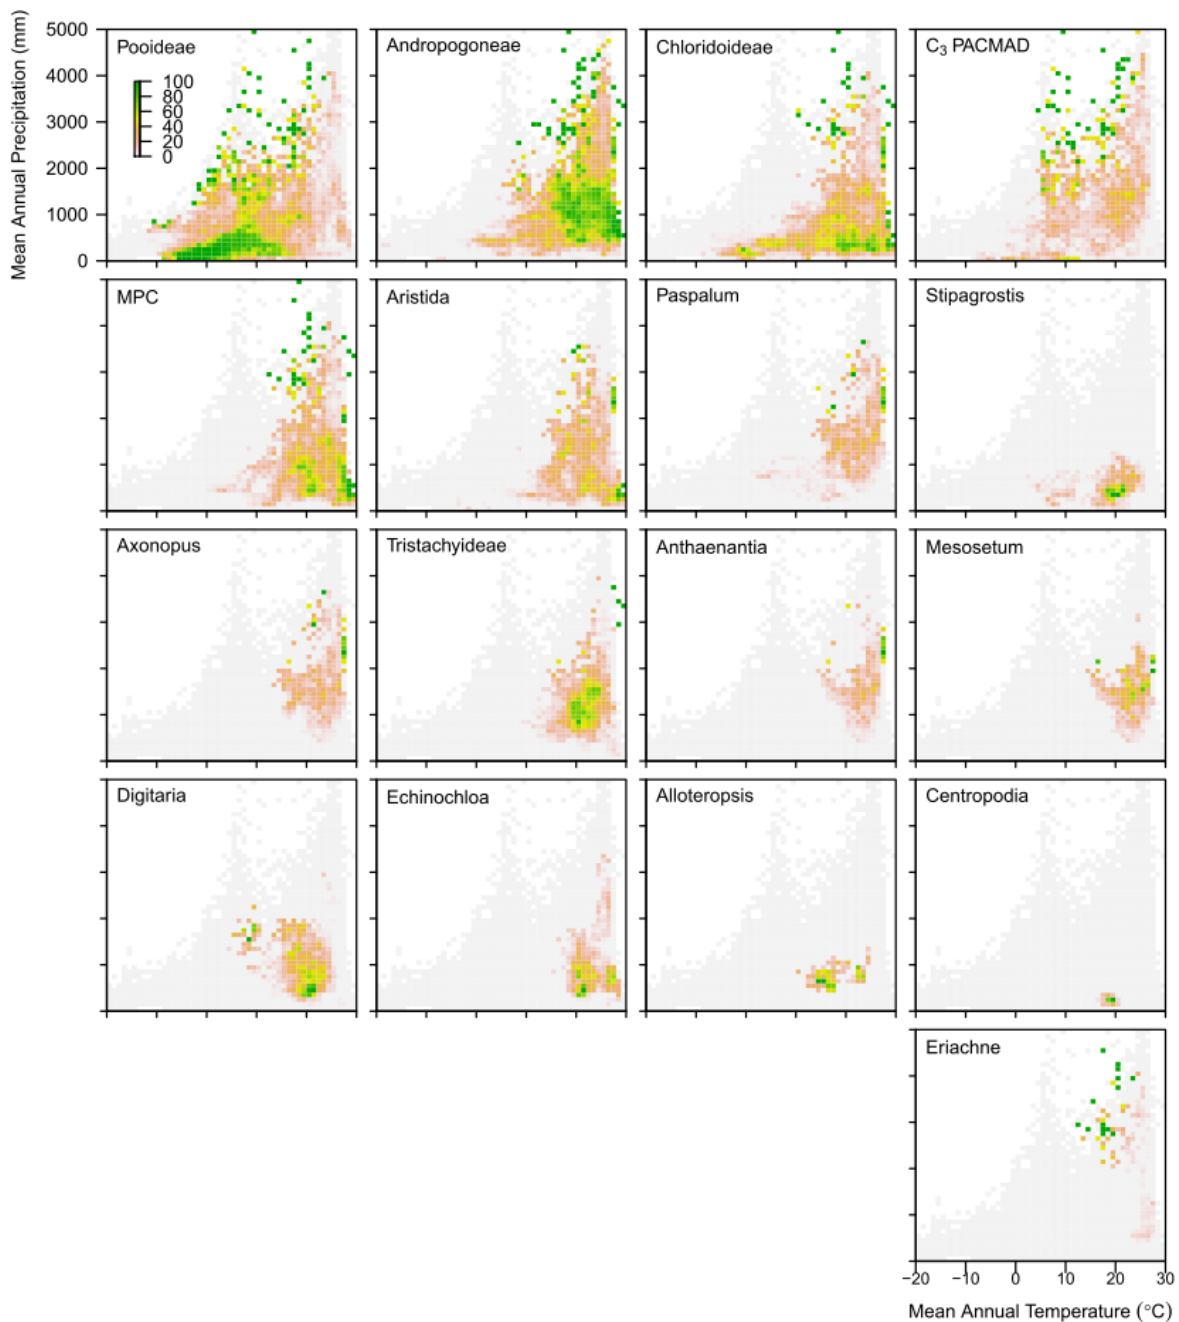

669

670 **Figure S5: Plots from Random Forest analyses of the relative importance of mean**  
671 **temperature, mean precipitation, temperature seasonality and rainfall seasonality in the**  
672 **limits of the three key lineages of grasses. A) C3 BEP, B) C4 Andropogoneae, and C) C4**  
673 **Chloridoideae. Model fits against data are shown for the land area over which each lineage**  
674 **dominates against each climate variable.**

675

676 **A. C<sub>3</sub> BEP**

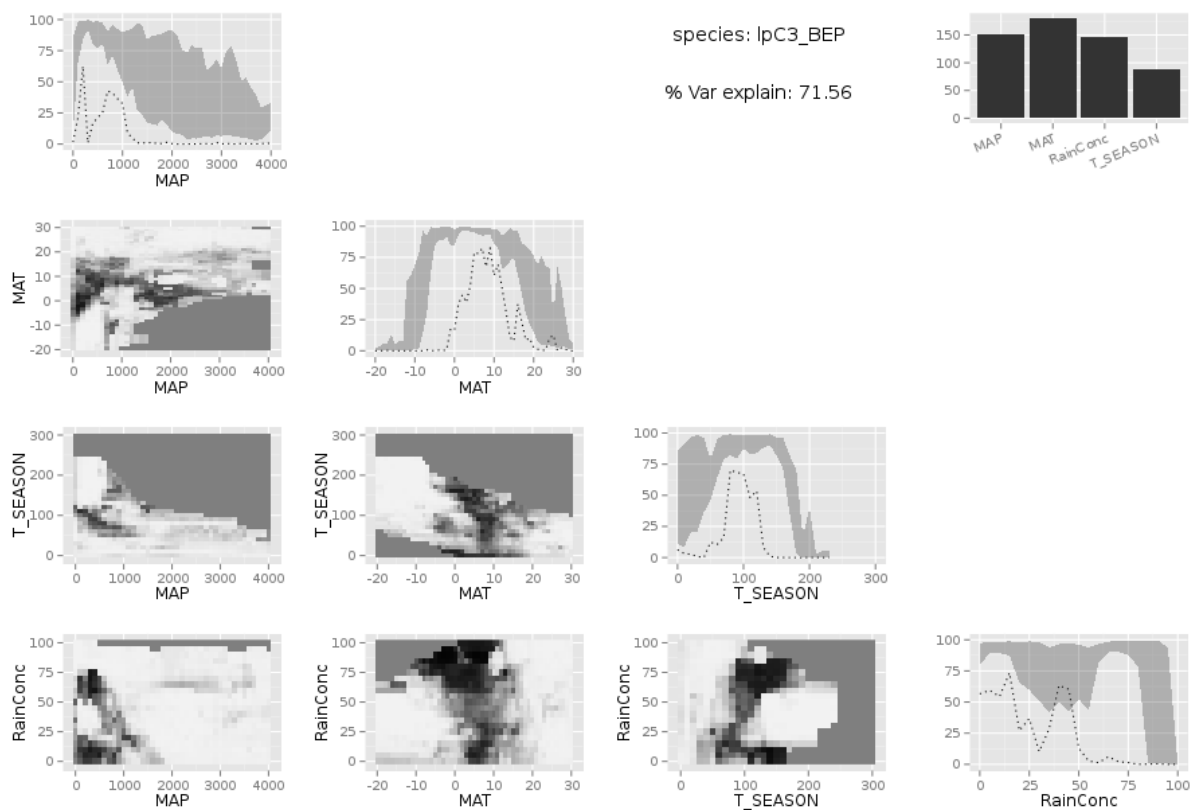

677

678

679 **B. C<sub>4</sub> Andropogoneae**

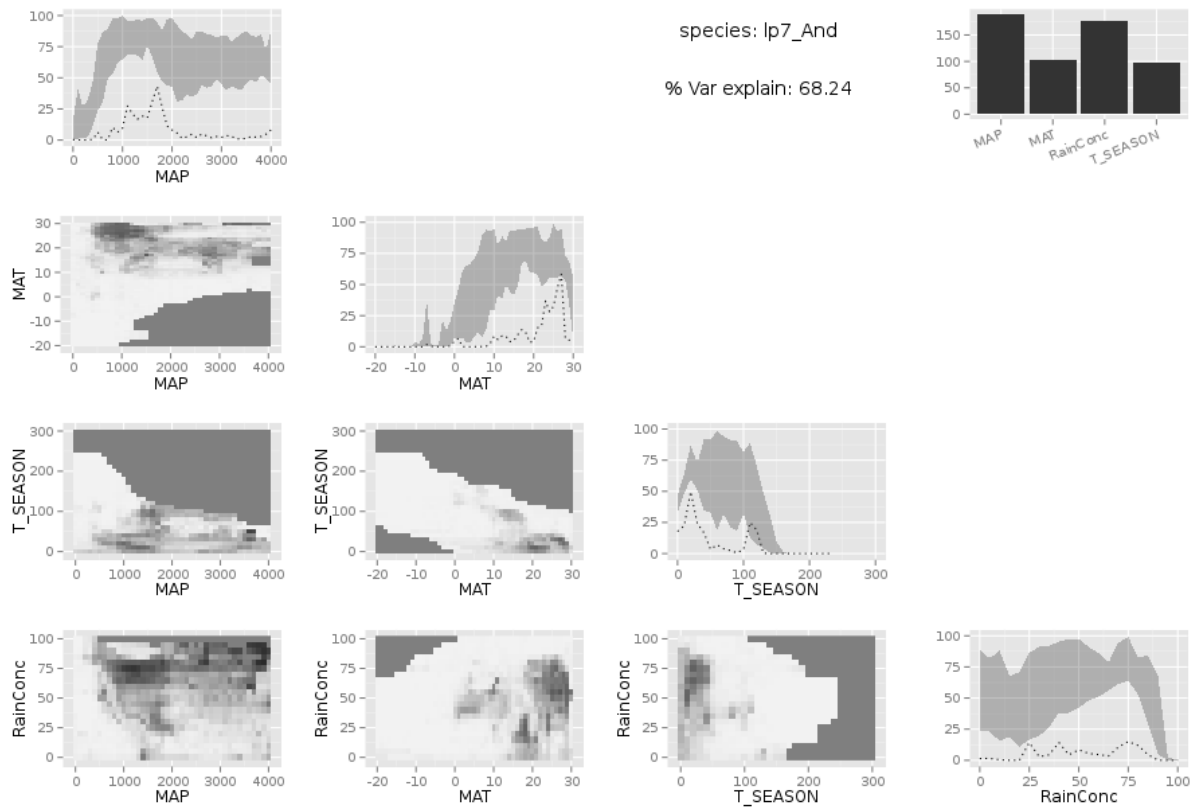

680



681 C. C<sub>4</sub> Chloridoideae

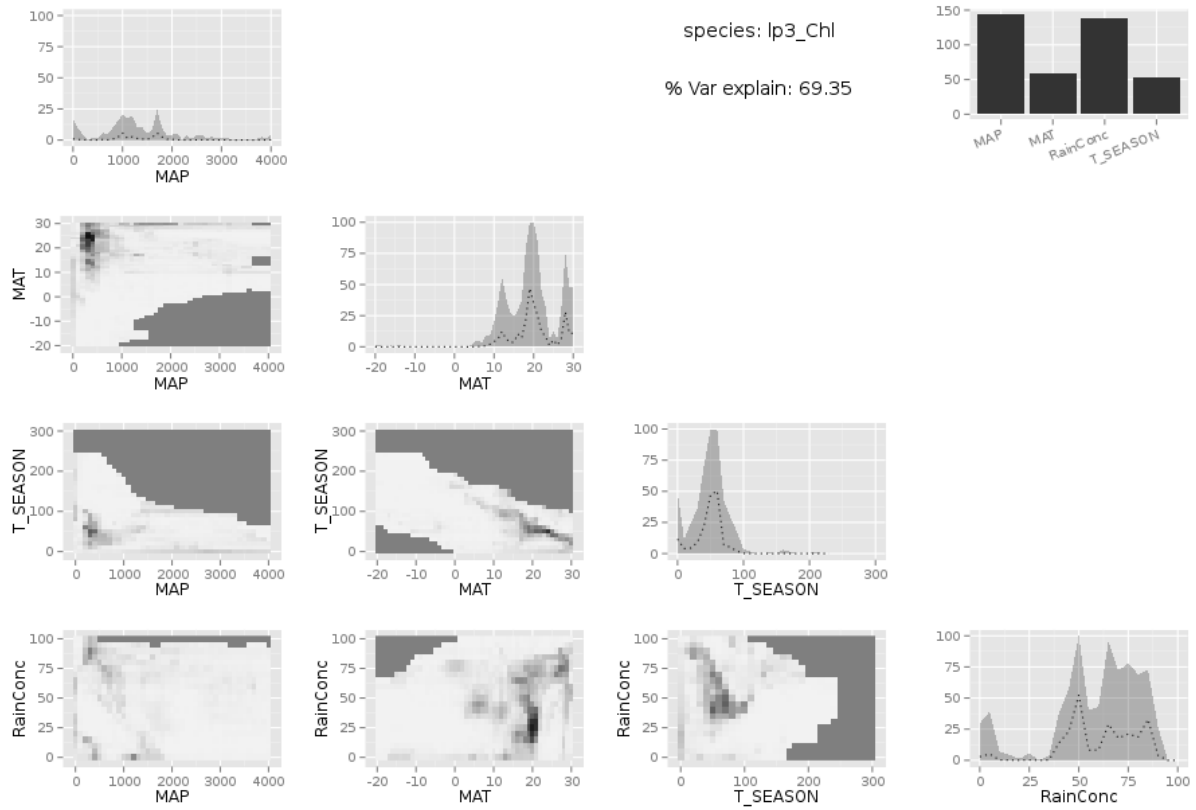

682

683 **Figure S6. Lineage – temperature associations.**

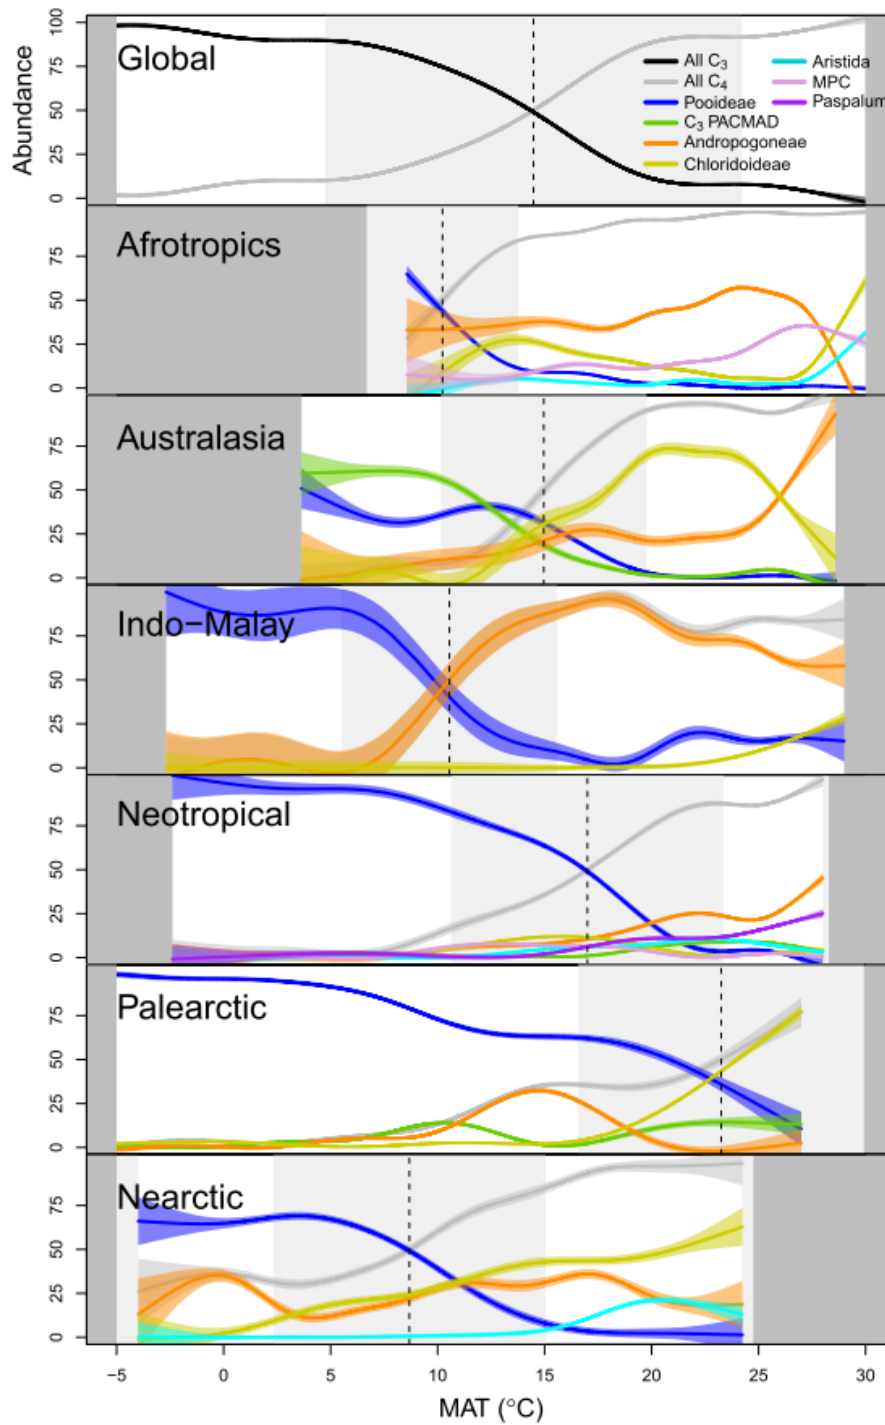

684

685 **Fig. S7: Trait-environment associations.** Density plots of traits that characterise the realised  
686 ecological niche of dominant grass lineages: A) Median minimum annual temperature ( $^{\circ}\text{C}$ )  
687 across the range of each species; B) Median drought length (months); and C) Median fire  
688 return interval (years), calculated by mapping GBIF occurrence data for each species onto  
689 Earth Observation data layers (see Methods). D) Maximum height of the culm (flowering stem)  
690 for each species, as a measure of plant size at maturity (see Methods). In each case, species  
691 from each lineage recorded within vegetation units in our dataset were mapped across their  
692 whole range (i.e. beyond the area over which they dominate ground cover).

693

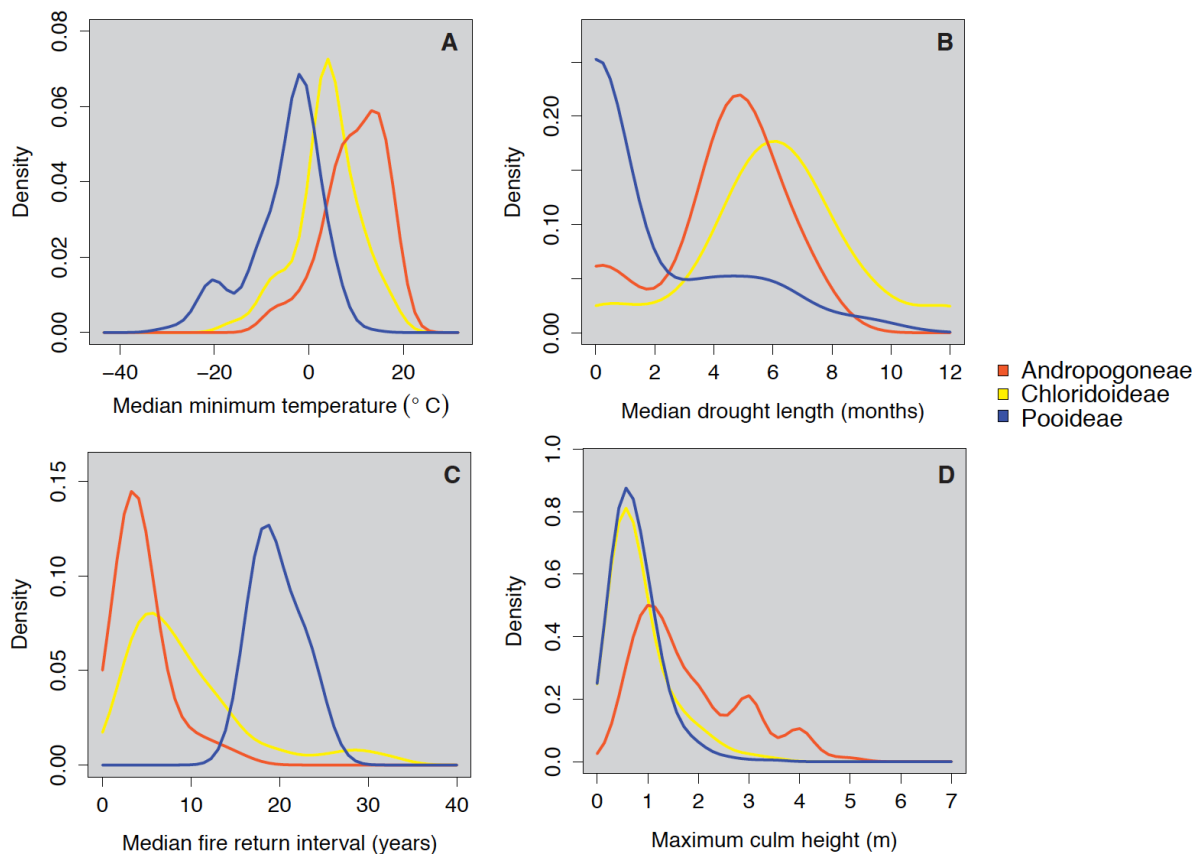

694

695 **Figure S8. Ordination of fire frequency and herbivore biomass with the 90<sup>th</sup> quantile of**  
696 **lineage distributions shown via different colours.** This ordination shows the limits of five  
697 grass lineages relative to the prevalence of fire and modelled herbivore biomass. Colours  
698 representing lineages are consistent with figures in the main text. Key here is that one lineage  
699 stretches into environments of more frequent fire (Andropogoneae = orange), while a number  
700 of lineages are clustered and overlapping with respect to variation in herbivore biomass.  
701 However, it is worth noting the globally poor data on herbivore biomass in contrast to fire that  
702 is relatively easily quantified by satellites as changes in surface reflectance and heat.

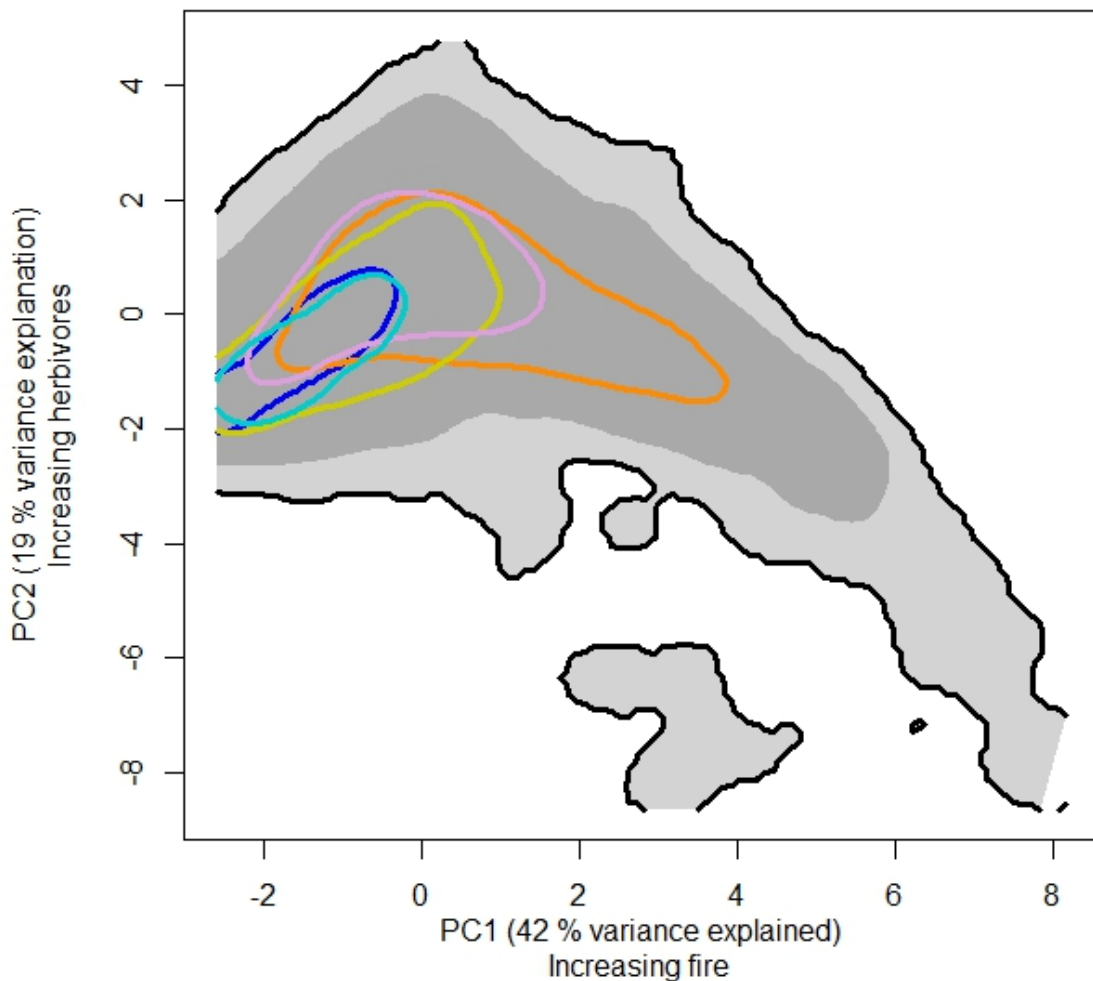

703

704

705 **Figure S9. Validation of mapping approach to determine function and lineage level**  
706 **distributions of grassy biomes.** Shown are figures relating plot level versus map level  
707 estimates of different grass groups (as shown on each plot). Logistic regression was used to  
708 quantify relationships and the deviance explained of the analyses are shown on each plot.

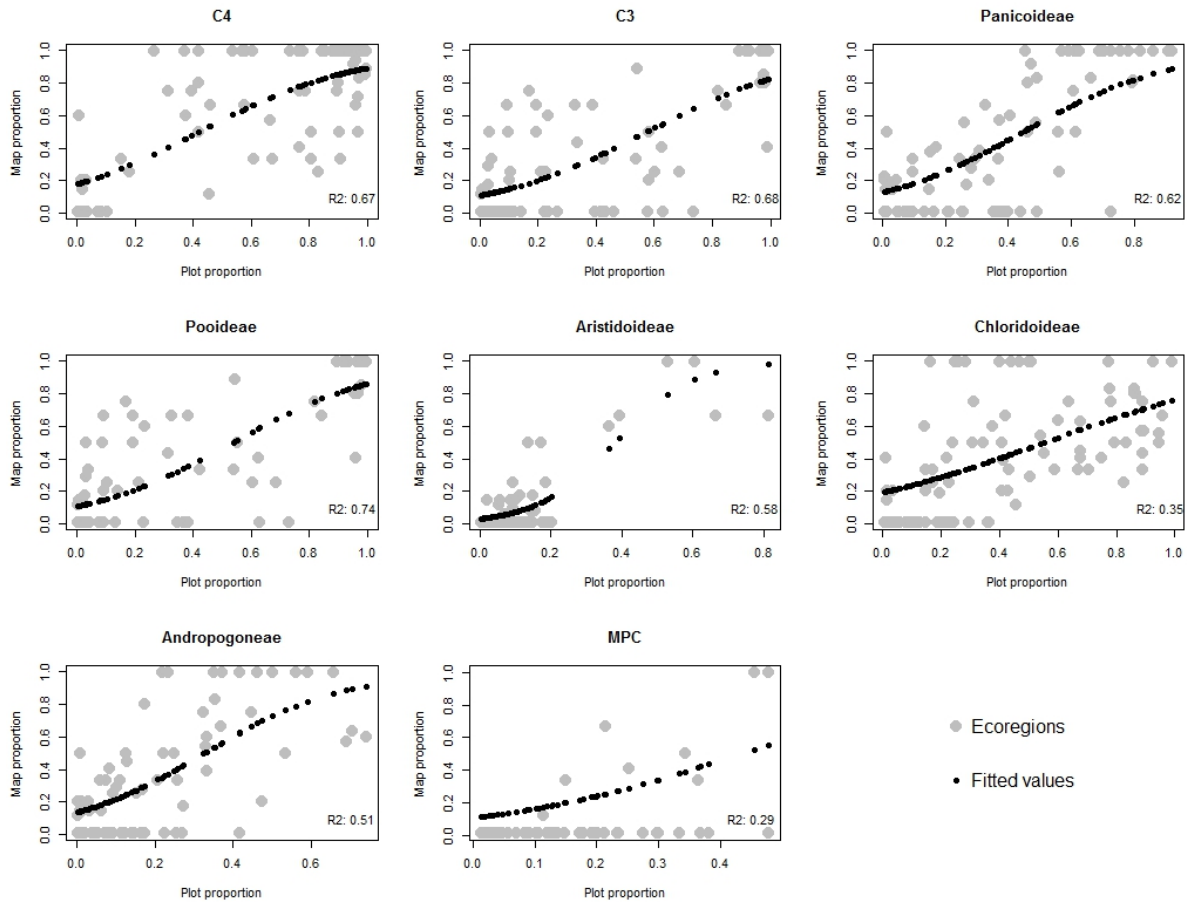

709

710

711 **Table S1: Land area occupied by each grass lineage.** Each column represents a slightly  
712 different way to calculate the relative coverage of grassy biomes by different grass lineages.  
713 Polygon calculations are based on the mapped polygons while grid cells represent the  
714 conversion of data from Both calculations use a WGS84 projection.

| <b>LINEAGE</b> | <b>Percentage of grassy (from polygons)</b> | <b>Percentage of grassy (from grid cells)</b> |
|----------------|---------------------------------------------|-----------------------------------------------|
| Andropogoneae  | 38.99                                       | 36.66                                         |
| C3 BEP         | 32.51                                       | 37.57                                         |
| Chloridoideae  | 13.93                                       | 13.51                                         |
| Mixed          | 10.66                                       | 6.56                                          |
| MPC            | 1.38                                        | 1.48                                          |
| C3 PACMAD      | 0.92                                        | 2.06                                          |
| Aristida       | 0.64                                        | 0.73                                          |
| Stipagrostis   | 0.62                                        | 0.53                                          |
| Paspalum       | 0.18                                        | 0.64                                          |
| Tristachyideae | 0.09                                        | 0.09                                          |
| Axonopus       | 0.07                                        | 0.17                                          |

715

716 **Appendix S1: Supplemental Data References**

717

718 **References to vegetation maps and associated descriptions**

719 Barbour, M. G. and Major, J. 2007. Terrestrial vegetation of California, 3rd ed. University of  
720 California Press, Los Angeles.

721 BirdLife International 2004. Important Birds Areas in Asia: key sites for conservation.  
722 Cambridge, UK: BirdLife International. (BirdLife Conservation Series No. 13).

723 Blair, G.J. and Rudolf, W., 1984. Grasslands of Indonesia and the effect of animals on their  
724 stability. on land evaluation for extensive grazing (LEEG), p.153.

725 Blasco, F., Bellan, M.F. and Aizpuru, M., 1996. A vegetation map of tropical continental Asia at  
726 scale 1: 5 million. Journal of Vegetation Science, 7(5), pp.623-634.

727 Bohn U, Neuhäusl R, Gollub G, Hettwer C, Neuhäuslová Z, Schlüter H, Weber H. 2003. Karte  
728 der natürlichen Vegetation Europas. Maßstab 1:2.500.000 / Map of the Natural  
729 Vegetation of Europe. Maßstab / Scale 1:2.500.000. Münster, Germany:  
730 Landwirtschaftsverlag. 3 volumes + CD.

731 Breckle, S.-W., Ditman, A. & Rafiqpoor, M.D. 2010. Field guide Afghanistan. Flora and  
732 vegetation. Scientia Bonnensis, Bonn, Germany. Map: GIS raster (shape files) supplied  
733 by Daoud Rafiqpoor and these data correspond to the map in Breckle et al. 2010, Fig.  
734 2.01: natural vegetation of Afghanistan. Description of vegetation types: Breckle et al.  
735 2010, pp 91-115

736 Comer, P., D. Faber-Langendoen, R. Evans, S. Gawler, C. Josse, G. Kittel, S. Menard, M. Pyne,  
737 M. Reid, K. Schulz, K. Snow, and J. Teague. 2003. Ecological Systems of the United  
738 States: A Working Classification of U.S. Terrestrial Systems. NatureServe, Arlington,  
739 Virginia.

740 Comision Nacional para el Conocimiento y Uso de la Biodiversidad (CONABIO), 1999. "Uso de  
741 suelo y vegetacion modificado por CONABIO". Escala 1: 1000 000. Comision Nacional  
742 para el Conocimiento y Uso de la Biodiversidad. Ciudad de Mexico, Mexico.

743 Djoeroemana, S. and Myers, B., 2000. Fire and sustainable agricultural and forestry  
744 development in eastern Indonesia and northern Australia. In International workshop  
745 on Fire and Sustainable Agricultural and Forestry Development in Eastern Indonesia  
746 and Northern Australia. Australian Centre for International Agricultural Research,  
747 Canberra.

748 Editorial Committee of Vegetation Map of China, 2007. Vegetation map of the People's  
749 Republic of China (1:1000,000). Geological Publishing House, Beijing, CN.

750 European Environmental Agency. 2010. Manual for the European Environment Agency's Land  
751 accounts data viewer 2000-2006 version 1 – 17/11/2010.

- 752 [http://www.eea.europa.eu/data-and-maps/figures/corine-land-cover-2006-by-](http://www.eea.europa.eu/data-and-maps/figures/corine-land-cover-2006-by-country-1)  
753 [country-1](http://www.eea.europa.eu/data-and-maps/figures/corine-land-cover-2006-by-country-1)
- 754 Fox, I.D., Neldner, V.J., Wilson, G.W. & Bannink, P.J. 2001. The vegetation of the Australian  
755 tropical savannas. Brisbane: Environment Protection Agency.
- 756 Garrity, D.P., Soekardi, M., Van Noordwijk, M., De La Cruz, R., Pathak, P.S., Gunasena, H.P.M.,  
757 Van So, N., Huijun, G. and Majid, N.M., 1996. The Imperata grasslands of tropical Asia:  
758 area, distribution, and typology. *Agroforestry Systems*, 36(1-3), pp.3-29.
- 759 Griffith, G.E., Omernik, J.M., Johnson, C.B., and Turner, D.S., In prep., Ecoregions of Arizona  
760 (color poster with map, descriptive text, summary tables, and photographs): Menlo  
761 Park, California, U.S. Geological Survey (map scale 1:1,325,000).
- 762 Hannibal, L.W., 1950. Vegetation Map of Indonesia. Planning Department, Forest Service,  
763 Jakarta. Forest Policies in Indonesia: The Sustainable Development of Forest Lands,  
764 3.Brookfield, H. and Byron, Y., 1993. South-East Asia's environmental future: the  
765 search for sustainability.
- 766 Harris, S and Kitchener, A 2005. From Forest to Fjaeldmark: Descriptions of Tasmania's  
767 Vegetation. Department of Primary Industries, Water and Environment, Printing  
768 Authority of Tasmania. Hobart.
- 769 Huber, O., 1988. Mapa de vegetación de Venezuela. República de Venezuela, Ministerio del  
770 Ambiente y de los Recursos Naturales Renovables, Dirección Genreal de Información  
771 e Investigación del Ambiente, Dirección de Suelos, Vegetación y Fauna, División de  
772 Vegetación.
- 773 Huber, O., Gharbarran, G. and Funk, V.A., 1995. Vegetation map of Guyana. Centre for the  
774 Study of Biological Diversity, University of Guyana.
- 775 IBGE, D., 1993. Vegetation Map of Brazil. Rio de Janeiro: IBGE.
- 776 Isachenko, T. I. (ed.) 1990. Vegetation of the Soviet Union. Scale 1:4,000,000. Institute of  
777 Geography, Siberian Dept. of the USSR Academy of Sciences. Novosibirsk.
- 778 Karamysheva ZV, Khramtsov VN. 1995. The steppes of Mongolia. *Braun-Blanquetia* 17:1–79.
- 779 Kuchler, A.W. 1964. Potential natural vegetation of the conterminous United States. American  
780 Geographical Society, University of Minnesota.
- 781 Navarro, G. and Ferreira, W., 2007. Mapa de vegetación de Bolivia a escala 1: 250.000. On CD-  
782 ROM. The Nature Conservancy (TNC), RUMBOL. Cochabamba, Bolivia.
- 783 Maxwell, A. L. 2004. Fire regimes in north-eastern Cambodian monsoonal forests, with a 9300-  
784 year sediment charcoal record. *Journal of Biogeography*, 31, 225-239.
- 785 Olson, D. M., Dinerstein, E., Wikramanayake, E. D., Burgess, N. D., Powell, G. V., Underwood,  
786 E. C., D'amico, J. A., Itoua, I., Strand, H. E. & Morrison, J. C. 2001. Terrestrial Ecoregions



- 787 of the World: A New Map of Life on Earth A new global map of terrestrial ecoregions  
788 provides an innovative tool for conserving biodiversity. *BioScience*, 51, 933-938.
- 789 Otsamo, A., Ådjers, G., Hadi, T.S., Kuusipalo, J. and Vuokko, R., 1997. Evaluation of  
790 reforestation potential of 83 tree species planted on *Imperata cylindrica* dominated  
791 grassland—A case study from South Kalimantan, Indonesia. *New Forests*, 14(2), pp.127-  
792 143.
- 793 Pajmians K, CSIRO, 1975. Explanatory Notes to the Vegetation map of Papua New Guinea.  
794 CSIRO, Melbourne, AU.
- 795 Pattiselanno, F. and Arobaya, A.Y.S., 2009. Grazing Habitat of the Rusa Deer (*Cervus*  
796 *timorensis*) in the Upland Kebar, Manokwari. *Biodiversitas Journal of Biological*  
797 *Diversity*, 10(3).
- 798 Shepherd, D.P. 2003. Implementation of the National Vegetation Information System model  
799 in Western Australia. Milestone 6 Report. Final report on the implementation of the  
800 National Vegetation System model in Western Australia. Department of Agriculture,  
801 Perth. Unpublished Report to the Bureau of Rural Sciences, Canberra. Which was later  
802 replaced by publication of: Beard JS, Beeston GR, Harvey JM, Hopkins AJM, Shepherd  
803 DP. 2013. The Vegetation of Western Australia at the 1:3,000,000 Scale. Explanatory  
804 Memoir. 2nd ed. *Conservation Science Western Australia* 9: 1–152.
- 805 Stone, T.A. and Schlesinger, P. 1993. Digitization of the Map "Vegetation of the Soviet Union,  
806 1990." A Report to the Northeast Forest Experiment Station, USDA Forest Service,  
807 Global Change Research Program, Radnor, Pennsylvania. See companion file  
808 [http://daac.ornl.gov/daacdata/russian\\_land\\_cover/vegetation\\_1990/comp/vmap90\\_](http://daac.ornl.gov/daacdata/russian_land_cover/vegetation_1990/comp/vmap90_method.pdf)  
809 [method.pdf](http://daac.ornl.gov/daacdata/russian_land_cover/vegetation_1990/comp/vmap90_method.pdf).
- 810 Stone, T.A. and Schlesinger, P. 2003. RLC Vegetative Cover of the Former Soviet Union, 1990.  
811 Data set. Available on-line [<http://www.daac.ornl.gov>] from Oak Ridge National  
812 Laboratory Distributed Active Archive Center, Oak Ridge, Tennessee, U.S.A.  
813 doi:10.3334/ORNLDAAAC/700.
- 814 Stott, P. 1988. The Forest as Phoenix: Towards a Biogeography of Fire in Mainland South East  
815 Asia. *The Geographical Journal*, 154, 337-350.
- 816 Tang Z, Fang J, Chi X, Yang Y, Ma W, Mohhamot A, Guo Z, Liu Y, Gaston KJ. (2012) *Geography,*  
817 *environment, and spatial turnover of species in China's grasslands. Ecography*  
818 *35:1103–1109. doi: 10.1111/j.1600-0587.2012.07713.x*
- 819 White, F. 1983. The vegetation of Africa, a descriptive memoir to accompany the  
820 UNESCO/AETFAT/UNSO vegetation map of Africa.
- 821 Wilson, B. A., Brocklehurst, P. S., Clark, M. J. & Dickinson, K. J. M. 1990. Vegetation survey of  
822 the Northern Territory, Australia. Darwin: Conservation Commission of the Northern  
823 Territory.

824 **Plot data references for validation of map**

825 ABARES. (2012) *Ground Cover Reference Sites Database, Version 9 /2014*. ÆKOS Data Portal  
826 (<http://www.portal.aekos.org.au/>). Accessed: 16 July 2014.

827 Abule E, Smit GN, Snyman HA. (2005) The influence of woody plants and livestock grazing on  
828 grass species composition, yield and soil nutrients in the Middle Awash Valley of  
829 Ethiopia. *J Arid Environ* 60:343–358. doi:10.1016/j.jaridenv.2004.04.006.

830 Alberti J, Canepuccia A, Pascual J, Pérez C, Iribarne O. (2011) Joint control by rodent  
831 herbivory and nutrient availability of plant diversity in a salt marsh–salty steppe  
832 transition zone. *J Veg Sci* 22:216–224. doi:10.1111/j.1654-1103.2010.01240.x.

833 Alhamad MN, Alrababah MA, Gharaibeh MA (2012) Impact of burning and fertilization on  
834 dry Mediterranean grassland productivity and diversity. *Acta Oecol* 40:19–26.  
835 doi:10.1016/j.actao.2012.02.005.

836 Ao M, Ito M, Ito K, Yun JF, Miura R, Tominaga T. (2008) Floristic compositions of Inner  
837 Mongolian grasslands under different land-use conditions. *Grassl Sci* 54:173–178.  
838 doi:10.1111/j.1744-697X.2008.00121.x.

839 Asebrook J. (2003) *Grasslands of Glacier National Park. (GRAS) National Park Service*  
840 *Mapping Project in Montana*. <http://vegbank.org/cite/VB.Ob.6325.GRAS00005>.  
841 Accessed: 09 January 2013.

842 Banyikwa FF, Feoli E, Zuccarello V. (1990) Fuzzy set ordination and classification of Serengeti  
843 short grasslands, Tanzania. *J Veg Sci* 1:97–104.

844 Barnes DL, Rethman NFG, Beukes BH, Kotzé GD. (1984) Veld composition in relation to  
845 grazing capacity. *J Grassl Soc Southern Afr* 1:16–19.  
846 doi:10.1080/02566702.1984.9647960.

847 Beckley A. (2012). *Honey Hill Vegetation Data*.  
848 <http://vegbank.org/cite/VB.ob.78830.126010504>. Accessed: 09 January 2013.

849 Belachew G, Demissew S, Woldu Z. (2012) *Floristic Composition and Structure of Riverine*  
850 *Vegetation. The Case of Beschillo and Abay (Blue Nile)*. Lambert Academic Publishing.

851 Bell J, Cogan D, Erixson J, Von Loh J. (2009) *Vegetation Inventory Project Report. Craters of*  
852 *the Moon National Monument and Preserve*. Natural Resource Technical Report  
853 NPS/UCBN/NRTR—2009/277. National Park Service, Fort Collins, CO.

- 854 Belsky AJ. (1992) Effects of grazing, competition, disturbance and fire on species composition  
855 and diversity in grassland communities. *J Veg Sci* 3:187–200. doi:10.2307/3235679.
- 856 Berliner D, Kioko J. (1999) The effect of long-term mowing and ungulate exclusion on grass  
857 species composition and soil nutrient status on the Athi-Kapiti Plains, Central Kenya.  
858 *Afr J Range Forage Sci* 16:62–70. doi:10.2989/10220119909485720.
- 859 Bonyongo MC, Veenendaal E, Bredenkamp GJ. (2000) Floodplain vegetation in the Nxaraga  
860 Lagoon Area, Okavango Delta, Botswana. *S Afr J Bot* 66:15–21.
- 861 Boyer M, Dellinger B. (2012) *Longleaf – Southeastern NC Vegetation Data*.  
862 [http://vegbank.org/cite/urn:lsid:cvs.bio.unc.edu:observation:1054-%7BF477A5F3-](http://vegbank.org/cite/urn:lsid:cvs.bio.unc.edu:observation:1054-%7BF477A5F3-D04B-44AC-ADDD-6B15EB709D8F%7D)  
863 [D04B-44AC-ADDD-6B15EB709D8F%7D](http://vegbank.org/cite/urn:lsid:cvs.bio.unc.edu:observation:1054-%7BF477A5F3-D04B-44AC-ADDD-6B15EB709D8F%7D). Accessed: 09/01/2013.
- 864 Brockett B. (2001) Sampling efficiency for species composition assessments using the wheel-  
865 point method in a semi-arid savanna. *Afr J Range Forage Sci* 18:93–101.  
866 doi:10.2989/10220110109485761.
- 867 Brookman-Amisshah J, Hall JB, Swaine MD, Attakorah JY. (1980) A re-assessment of a fire  
868 protection experiment in north-eastern Ghana savanna. *J Appl Ecol* 17:85–99.  
869 doi:10.2307/2402965.
- 870 Burns CE, Collins SL, Smith MD. (2009) Plant community response to loss of large herbivores:  
871 Comparing consequences in a South African and a North American grassland.  
872 *Biodivers Conserv* 18:2327–2342. doi:10.1007/s10531-009-9590-x.
- 873 Carr S. (2007) *Floristic and Environmental Variation of Pyrogenic Pinelands in the*  
874 *Southeastern Coastal Plain: Description, Classification, and Restoration*. PhD Thesis,  
875 University of Florida, Gainesville, FL.
- 876 Carr SC, Robertson KM, Peet RK. (2010) A vegetation classification of fire-dependent  
877 pinelands of Florida. *Castanea* 75:153–189.
- 878 Carter AJ, O’Connor TG. (1991) A two-phase mosaic in a savanna grassland. *J Veg Sci* 2:231–  
879 236.
- 880 Cecil F (2012) *Longleaf – Fall-line Sandhills Vegetation Data*.  
881 [http://vegbank.org/cite/urn:lsid:cvs.bio.unc.edu:observation:792-%7BB0F4BECC-](http://vegbank.org/cite/urn:lsid:cvs.bio.unc.edu:observation:792-%7BB0F4BECC-1771-4A27-89A5-8BFFFD26D232%7D)  
882 [1771-4A27-89A5-8BFFFD26D232%7D](http://vegbank.org/cite/urn:lsid:cvs.bio.unc.edu:observation:792-%7BB0F4BECC-1771-4A27-89A5-8BFFFD26D232%7D). Accessed: 09/01/2013.
- 883 Chastain RA, Struckhoff MA, Grabner KW, Stroh ED, He H, Larsen DR, Nigh TA, Drake J. (2006)  
884 *Mapping Vegetation Communities in Ozark National Scenic Riverways*. Final Technical

- 885 Report to the National Park Service: U.S. Geological Survey Open-File Report 2006-  
886 1354.
- 887 Cogan D. (2007) *Vegetation Classification and Mapping Project Report, Lyndon B. Johnson*  
888 *National Historical Park*. Natural Resource Technical Report NPS/SOPN/NRTR—  
889 2007/073. National Park Service, Fort Collins, CO.
- 890 Cogan D. (2007) *Vegetation Classification and Mapping Project Report, San Antonio Missions*  
891 *National Historical Park*. Natural Resource Technical Report NPS/GULN/NRTR—  
892 2007/074. National Park Service, Fort Collins, CO.
- 893 Cogan D. (2007) *Vegetation Classification and Mapping Project Report, Washita Battlefield*  
894 *National Historic Site*. Natural Resource Technical Report NPS/SOPN/NRTR—  
895 2007/075. National Park Service, Fort Collins, CO.
- 896 Cogan D, Varga K, Kittel G, McCloskey K, Gremer J, Abendroth D, Bolen C. (2005) *USGS-NPS-*  
897 *USGS Vegetation Mapping Program: Grand Teton National Park 2002–2005*.  
898 *Vegetation Mapping Project Report*. U.S. Geological Survey.
- 899 Cogan D, Walker L, Loring H, Jog S, Delisle J. (2007) *Vegetation Classification and Mapping*  
900 *Project Report. Fort Larned National Historic Site*. Natural Resource Technical Report  
901 NPS/SOPN/NRTR—2007/072. National Park Service, Fort Collins, CO.
- 902 Cogan D, Reid M, Schulz K, Pucherelli M. (2003) *USGS-NPS Vegetation Mapping Program:*  
903 *Zion National Park, Utah*. Project Report. U.S. Geological Survey.
- 904 Cogan D, Marriot H, Von Loh J, Pucherelli MJ. (1999) *USGS-NPS Vegetation Mapping*  
905 *Program: Wind Cave National Park, South Dakota*. Project Report. U.S. Geological  
906 Survey.
- 907 Dad JM, Khan AB. (2010) Floristic composition of an alpine grassland in Bandipora, Kashmir.  
908 *Grassl Sci* 56:87–94. doi:10.1111/j.1744-697X.2010.00179.x.
- 909 Daly C, Halbleib M, Smith JI, Gibson WP, Doggett MK, Taylor GH. (2008) Physiographically  
910 sensitive mapping of climatological temperature and precipitation across the  
911 conterminous United States. *Int J Climatol* 28:2031–2064.
- 912 de Abreu RCR, Durigan G. (2011) Changes in the plant community of a Brazilian grassland  
913 savannah after 22 years of invasion by *Pinus elliottii* Engelm. *Plant Ecol Divers* 4:269–  
914 278. doi:10.1080/17550874.2011.594101.

- 915 De Sanctis M, Adeeb A, Farcomeni A, Patriarca C, Saed A, Attorre F. (2012) Classification and  
916 distribution patterns of plant communities on Socotra Island, Yemen. *Appl Veg Sci*  
917 16:148–165. doi:10.1111/j.1654-109X.2012.01212.x.
- 918 Department of Environment, Water and Natural Resources. (2012) *Biological Survey of South*  
919 *Australia. Vegetation Survey, Biological Database of South Australia, Version 11*  
920 */2014*. ÆKOS Data Portal (<http://www.portal.aekos.org.au/>). Accessed: 16 July 2014.
- 921 Department of Parks and Wildlife, Biogeography Program (2012) *Biological Survey of the*  
922 *Ravensthorpe Range (Phase 1), Version 1 /2013*. ÆKOS Data Portal  
923 (<http://www.portal.aekos.org.au/>). Accessed: 16 July 2014.
- 924 Department of Primary Industries, Parks, Water and Environment. (2015) *Platypus Survey*  
925 *Data, Tasmania (1901–2009), Version 4 /2015*. ÆKOS Data Portal  
926 (<http://www.aekos.org.au/home>). Accessed: 16 July 2014.
- 927 Deshmukh I. (1986) Primary production of a grassland in Nairobi National Park, Kenya. *J Appl*  
928 *Ecol* 23:115–123.
- 929 Dhaou SO, Abdallah F, Belgacem, AO, Chaieb M. (2010) The protection effect on floristic  
930 diversity in a North African pseudo-savanna. *Pak J Bot* 42:1501–1510.
- 931 Downing BH, Robinson ER, Trollope WSW, Morris JM. (1978) Influence of macchia  
932 eradication techniques on botanical composition of grasses in the Döhne Sourveld of  
933 the Amatole Mountains. *Proc Annual Congr Grassl Soc Southern Afr* 13:111–115.  
934 doi:10.1080/00725560.1978.9648844.
- 935 du Toit PF, Aucamp AJ. (1985) Effect of continuous grazing in the Döhne Sourveld on species  
936 composition and basal cover. *J Grassl Soc Southern Afr* 2:41–45.  
937 doi:10.1080/02566702.1985.9648018.
- 938 Dunham KM. (1989) Vegetation–environment relations of a Middle Zambezi floodplain. *Plant*  
939 *Ecol* 82:13–24.
- 940 El-Ghareeb RM. (1991) Suppression of annuals by *Tribulus terrestris* in an abandoned field in  
941 the sandy desert of Kuwait. *J Veg Sci* 2: 147–154.
- 942 Ellery WN, Ellery K, Rogers KH, McCarthy TS, Walker BH. (1990) Vegetation of channels of the  
943 northeastern Okavango Delta, Botswana. *Afr J Ecol* 28:276–290. doi:10.1111/j.1365-  
944 2028.1990.tb01162.x.

- 945 Enright NJ, Miller BP, Akhter R. (2005) Desert vegetation and vegetation-environment  
946 relationships in Kirthar National Park, Sindh, Pakistan. *J Arid Environ* 61:397–418.
- 947 Erixson JA, Cogan D. (2009) *Vegetation Classification and Mapping of Hagerman Fossil Beds*  
948 *National Monument*. Natural Resource Technical Report NPS/UCBN/NRTR—  
949 2009/212. National Park Service, Fort Collins, CO.
- 950 Erixson JA, Cogan D, Von Loh J. (2011) *Vegetation Inventory Project Report: John Day Fossil*  
951 *Beds National Monument*. Natural Resource Technical Report NPS/UCBN/NRTR—  
952 2011/419. National Park Service, Fort Collins, CO.
- 953 Erixson JA, Cogan D, Von Loh J. (2011) *Vegetation Inventory Project Report: Lake Roosevelt*  
954 *National Recreation Area*. Natural Resource Report NPS/UCBN/NRR—2011/434  
955 National Park Service, Fort Collins, CO.
- 956 Evans R, Pyne M. (2012) *Angelina National Forest Vegetation Data*.  
957 <http://vegbank.org/cite/VB.ob.26846.ANGE10>. Accessed: 09 January 2013.
- 958 Evans R, Wiseland R. (2012) *Mississippi Vegetation Survey Vegetation Data*.  
959 <http://vegbank.org/cite/VB.ob.26967.MSVS4>. Accessed: 09 January 2013.
- 960 Evans R, Teague J. (2012) *Sam Houston National Forest Vegetation Data*.  
961 <http://vegbank.org/cite/VB.ob.27063.SAMH13>. Accessed: 09 January 2013.
- 962 Farris, E, Filighedd, R, Deiana P, Farris GA, Garau G. (2010) Short-term effects on sheep  
963 pastureland due to grazing abandonment in a Western Mediterranean island  
964 ecosystem: A multidisciplinary approach. *J Nat Conserv* 18:258–267.  
965 doi:10.1016/j.jnc.2009.11.003.
- 966 Felfili JM, Filgueiras TS, Haridasan M, Silva Júnior MC, Mendonça RC, Resende A. (1994)  
967 Projeto biogeografia do bioma cerrado: vegetação e solos. *Cadernos de Geociências*  
968 12:75–166.
- 969 Fenton K, Bell JR, Wegner D. (2006) *USGS-NPS Vegetation Mapping Program: Lake Meredith*  
970 *National Recreation Area and Alibates Flint Quarries National Monument, Texas*.  
971 Project Report. U.S. Geological Survey.
- 972 Ferreira PMA, Müller SC, Boldrini II, Eggers L. (2010) Floristic and vegetation structure of a  
973 granitic grassland in southern Brazil. *Rev Brasil Bot* 33:21–36.

- 974 Fidelis A. (2008) *Fire in Subtropical Grasslands in Southern Brazil: Effects on Plant Strategies*  
975 *and Vegetation Dynamics*. Technische Universität München, Wissenschaftszentrum  
976 Weihenstephan. <http://d-nb.info/991968948/34>.
- 977 Forrestel EJ. (2013) *Vegetation Cover Data from 10 Sites in the Great Plains, North America*.  
978 Unpublished data.
- 979 Gaddy C. (2012) *Congaree Swamp National Monument Vegetation Data*.  
980 [http://vegbank.org/cite/urn:lsid:cvs.bio.unc.edu:observation:4538-%7BA7C85EE9-](http://vegbank.org/cite/urn:lsid:cvs.bio.unc.edu:observation:4538-%7BA7C85EE9-4726-401A-B482-82254469D858%7D)  
981 [4726-401A-B482-82254469D858%7D](http://vegbank.org/cite/urn:lsid:cvs.bio.unc.edu:observation:4538-%7BA7C85EE9-4726-401A-B482-82254469D858%7D). Accessed: 09 January 2013.
- 982 Galal TM, Fahmy AG. (2012) Plant diversity and community structure of Wadi Gimal  
983 Protected Area, Red Sea coast of Egypt. *Afr J Ecol* 50:266–276.  
984 <http://onlinelibrary.wiley.com/doi/10.1111/j.1365-2028.2012.01320.x/full>.
- 985 Gallimore J. (2012) *McCall Outdoor Science School Vegetation Data*.  
986 <http://vegbank.org/cite/VB.ob.78625.JG01>. Accessed: 09 January 2013.
- 987 Glitzenstein J. (2012) *St. Francis National Forest Vegetation Data*.  
988 [http://vegbank.org/cite/urn:lsid:cvs.bio.unc.edu:observation:8996-{A6D80FD4-5777-](http://vegbank.org/cite/urn:lsid:cvs.bio.unc.edu:observation:8996-{A6D80FD4-5777-4B17-A778-08703107E334})  
989 [4B17-A778-08703107E334}](http://vegbank.org/cite/urn:lsid:cvs.bio.unc.edu:observation:8996-{A6D80FD4-5777-4B17-A778-08703107E334}). Accessed: 09 January 2013.
- 990 Grace P. (2010) *A Vegetation Survey of the Samford Ecological Research Facility (SERF)*.  
991 <https://researchdata.and.s.org.au/vegetation-survey-samford-facility-serf/663523>.
- 992 Hall M. (2012) *Short Mountain Wildlife Management Area Vegetation Data*.  
993 <http://vegbank.org/cite/VB.ob.27561.SHMO14>. Accessed: 09 January 2013.
- 994 Harkel MJ, van der Meulen F. (1996) Impact of grazing and atmospheric nitrogen deposition  
995 on the vegetation of dry coastal dune grasslands. *J Veg Sci* 7: 445–452.
- 996 Hayashi I, Kawada K, Akimova A, Nakamura T. (2006) Floristic composition and plant biomass  
997 of the grasslands in the vicinity of Pavlodar, Kazakhstan. *Grassl Sci* 52:141–146.  
998 [doi:10.1111/j.1744-697X.2006.00059.x](https://doi.org/10.1111/j.1744-697X.2006.00059.x).
- 999 Hejcmanová P, Hejcman M, Camara AA, Antonínová M. (2010) Exclusion of livestock grazing  
1000 and wood collection in dryland savannah: An effect on long-term vegetation  
1001 succession. *Afr J Ecol* 48:408–417.
- 1002 Hop K, Faber-Langendoen D, Lew-Smith M, Aaseng N, Lubinski S. (2001) *USGS-NPS*  
1003 *Vegetation Mapping Program: Voyageurs National Park*. Project Report. U.S.  
1004 Geological Survey.

- 1005 Hop K, Drake J, Lubinski S, Dieck J, Menard S. (2009) *National Park Service Vegetation*  
1006 *Inventory Program: Indiana Dunes National Lakeshore, Indiana*. U.S. Geological  
1007 Survey, Upper Midwest Environmental Sciences Center, La Crosse, WI.
- 1008 Hop K, Drake J, Lubinski S, Menard S, Dieck J. (2012) *National Park Service Vegetation*  
1009 *Inventory Program: Saint Croix National Scenic Riverway, Minnesota/Wisconsin*.  
1010 Natural Resource Report NPS/GLKN/NRR—2012/547. National Park Service, Fort  
1011 Collins, CO.
- 1012 Hop K, Pyne M, Foti T, Lubinski S, White R, Dieck J. (2012) *National Park Service Vegetation*  
1013 *Inventory Program: Buffalo National River, Arkansas*. Natural Resource Report  
1014 NPS/HTLN/NRR—2012/526. National Park Service, Fort Collins, CO.
- 1015 Hop K, Reid M, Dieck J, Lubinski S, Cooper S. (2007) *USGS-NPS Vegetation Mapping Program:*  
1016 *Waterton-Glacier International Peace Park*. U.S. Geological Survey, Upper Midwest  
1017 Environmental Sciences Center, La Crosse, WI.
- 1018 Hop K, Lubinski S, Menard S. (2005) *USGS-NPS Vegetation Mapping Program: Effigy Mounds*  
1019 *National Monument, Iowa*. U.S. Geological Survey, Upper Midwest Environmental  
1020 Sciences Center, La Crosse, WI.
- 1021 Hop K, Menard S, Drake J, Lubinski S, Dieck J. (2010) *National Park Service Vegetation*  
1022 *Inventory Program: Apostle Islands National Lakeshore, Wisconsin*. Natural Resource  
1023 Report NPS/GLKN/NRR—2010/199. National Park Service, Fort Collins, CO.
- 1024 Hop K, Menard S, Drake J, Lubinski S, Dieck J. (2010) *National Park Service Vegetation*  
1025 *Inventory Program: Pictured Rocks National Lakeshore, Michigan*. Natural Resource  
1026 Report NPS/GLKN/NRR—2010/201. National Park Service, Fort Collins, CO.
- 1027 Hop K, Menard S, Drake J, Lubinski S, Faber-Langendoen D, Dieck J. (2010) *National Park*  
1028 *Service Vegetation Inventory Program: Grand Portage National Monument,*  
1029 *Minnesota*. Natural Resource Report NPS/GLKN/NRR—2010/200. National Park  
1030 Service, Fort Collins, CO.
- 1031 Jauffret S, Lavorel S. (2003) Are plant functional types relevant to describe degradation in  
1032 arid, southern Tunisian steppes? *J Veg Sci* 14:399–408.
- 1033 Jennings M. (2012) *Composition and Function of Vegetation Alliances in the Interior*  
1034 *Northwest, USA*. <http://vegbank.org/cite/VB.Ob.10774.INW10717>. Accessed: 09  
1035 January 2013.



- 1036 Johnson A. (2012) *Apalachicola National Forest Vegetation Data*.  
1037 <http://vegbank.org/cite/VB.ob.26905.APAL74>. Accessed: 09 January 2013.
- 1038 Joint Remote Sensing Research Program. (2013) *AusCover Supersites SLATS Star Transects,*  
1039 *Version 2 /2013*. ÆKOS Data Portal (<http://www.portal.aekos.org.au/>). Accessed: 16  
1040 July 2014.
- 1041 Jones E, Pyne M. (2008) *Vascular Plant Inventory and Plant Community Classification for*  
1042 *Abraham Lincoln National Historic Site*. NatureServe, Durham, NC.
- 1043 Kawada K, Vovk AG, Filatova OV, Araki M, Nakamura T, Hayashi I. (2005) Floristic  
1044 composition and plant biomass production of steppe communities in the vicinity of  
1045 Kharkiv, Ukraine. *Grassl Sci* 51:205–213. doi:10.1111/j.1744-697X.2005.00026.x.
- 1046 Keeler-Wolf T, Moore PE, Reyes ET, Menke JM, Johnson DN, Karavidas DL. (2012) *Yosemite*  
1047 *National Park Vegetation Classification and Mapping Project Report*. Natural  
1048 Resource Technical Report NPS/YOSE/NRTR—2012/598. National Park Service, Fort  
1049 Collins, CO.
- 1050 Kelly M, Allen-Diaz B, Kobzina N. (2005) Digitization of a historic dataset: The Wieslander  
1051 California Vegetation Type Mapping Project. *Madroño* 52:191–201.
- 1052 Kindscher K, Kilroy H, Delisle J, Long Q, Loring H, Dobbs K, Drake J. (2011a) *Vegetation*  
1053 *Mapping and Classification of Homestead National Monument of America*. Natural  
1054 Resource Report NPS/HTLN/NRR—2011/345. National Park Service, Fort Collins, CO.
- 1055 Kindscher K, Kilroy H, Delisle J, Long Q, Loring H, Dobbs K, Drake J. (2011b) *Vegetation*  
1056 *Mapping and Classification of Tallgrass Prairie National Preserve*. Natural Resource  
1057 Report NRR/HTLN/NRR—2011/346. National Park Service, Fort Collins, CO.
- 1058 Kittel G, Reyes E, Evens J, Buck J, Johnson D. (2012) *Vegetation Classification and Mapping*  
1059 *Project Report. Pinnacles National Monument*. Natural Resource Report  
1060 NPS/SFAN/NRR—2012/574. National Park Service, Fort Collins, CO.
- 1061 Kittel G, VanWie E, Damm M, Rondeau R, Kettler S, McMullen A, Sanderson J. (1999) *A*  
1062 *Classification of Riparian Wetland Plant Associations of Colorado: User Guide to the*  
1063 *Classification Project*. Colorado Natural Heritage Program, Colorado State University,  
1064 Fort Collins, CO.
- 1065 Klopfer SD, Olivero A, Sneddon L, Lundgren J. (2002) *USGS-NPS Vegetation Mapping Project*  
1066 *at Fire Island National Seashore*. Project Report. U.S. Geological Survey.

- 1067 Koonamore Research Group. (2015) *Kangaroo Transects. Koonamore Vegetation Monitoring*  
1068 *Project (1925–present), Version 12 /2014. ÆKOS Data Portal*  
1069 (<http://www.aekos.org.au/home>). Accessed: 16 July 2014.
- 1070 Koonamore Research Group. (2015) *Photopoints. Koonamore Vegetation Monitoring Project*  
1071 *(1925–Present), Version 12 /2014. ÆKOS Data Portal*  
1072 (<http://www.aekos.org.au/home>). Accessed: 16 July 2014.
- 1073 Koonamore Research Group. (2015) *Myoporum platycarpum Survey. Koonamore Vegetation*  
1074 *Monitoring Project (1925–Present), Version 12 /2014. ÆKOS Data Portal*  
1075 (<http://www.aekos.org.au/home>). Accessed: 16 July 2014.
- 1076 Koonamore Research Group. (2015) *Rabbit Activity Monitoring and Control. Koonamore*  
1077 *Vegetation Monitoring Project (1925–Present), Version 12 /2014. ÆKOS Data Portal*  
1078 (<http://www.aekos.org.au/home>). Accessed 16 July 2014.
- 1079 Koonamore Research Group. (2015) *Saltbush Transects. Koonamore Vegetation Monitoring*  
1080 *Project (1925Present), Version 12 /2014. ÆKOS Data Portal*  
1081 (<http://www.aekos.org.au/home>). Accessed: 16 July 2014.
- 1082 Koonamore Research Group. (2015) *Senna Populations. Koonamore Vegetation Monitoring*  
1083 *Project (1925–Present), Version 12 /2014. ÆKOS Data Portal*  
1084 (<http://www.aekos.org.au/home>). Accessed: 16 July 2014.
- 1085 Koonamore Research Group. (2015) *Senna Quadrat (Cassia Corner). Koonamore Vegetation*  
1086 *Monitoring Project (1925–Present), Version 12 /2014. ÆKOS Data Portal*  
1087 (<http://www.aekos.org.au/home>). Accessed: 16 July 2014.
- 1088 Koonamore Research Group. (2015). *Vegetation Quadrats. Koonamore Vegetation*  
1089 *Monitoring Project (1925–Present), Version 12 /2014. ÆKOS Data Portal*  
1090 (<http://www.aekos.org.au/home>). Accessed: 16 July 2014.
- 1091 Kotze DC, O'Connor TG. (2000) Vegetation variation within and among palustrine wetlands  
1092 along an altitudinal gradient in KwaZulu-Natal, South Africa. *Plant Ecol* 146:77–96.
- 1093 Krueger E, Nordman C. (2012) *Francis Marion National Forest Vegetation Data.*  
1094 <http://vegbank.org/cite/VB.ob.78771.068FRMA16>. Accessed: 09 January 2013.
- 1095 Kunz D, Baker G, Peet R. (2012) *Croatan National Forest Vegetation Data.*  
1096 [http://vegbank.org/cite/urn:lsid:cvs.bio.unc.edu:observation:7642-{EB625604-8404-](http://vegbank.org/cite/urn:lsid:cvs.bio.unc.edu:observation:7642-{EB625604-8404-4635-8B89-507E699C31E8})  
1097 [4635-8B89-507E699C31E8}](http://vegbank.org/cite/urn:lsid:cvs.bio.unc.edu:observation:7642-{EB625604-8404-4635-8B89-507E699C31E8}). Accessed: 09 January 2013.

- 1098 Kwatrina RT. (2009) Penentuan Kuota Panenan Dan Ukuran Populasi Awal Rusa Timor Di  
1099 Penangkaran Hutan Penelitian Dramaga.  
1100 <http://repository.ipb.ac.id/handle/123456789/5368>.
- 1101 Lenzi-Grillini CR, Viskanic P, Mapesa M. (1996) Effects of 20 years of grazing exclusion in an  
1102 area of the Queen Elizabeth National Park, Uganda. *Afr J Ecol* 34:333–341.  
1103 doi:10.1111/j.1365-2028.1996.tb00629.x.
- 1104 Lubinski S, Hop K, Grawler S. (2003) *USGS-NPS Vegetation Mapping Program: Acadia*  
1105 *National Park, Maine*. Project Report. U.S. Geological Survey.
- 1106 Madden M, Welch R, Jordan T, Jackson P, Seavey R, Seavey J. (2004) *Digital Vegetation Maps*  
1107 *for the Great Smoky Mountains National Park*. Project Report.
- 1108 Marriot H, Drake J, Curtis A, Grossman D. (1998) *USGS-NPS Vegetation Mapping Program:*  
1109 *Classification of the vegetation of Fort Laramie National Historic Site*. The Nature  
1110 Conservancy, Minneapolis, MN.
- 1111 Marriot H, McAdams A, Stutzman D, Drake J, Grossman D. (1998) *USGS-NPS Vegetation*  
1112 *Mapping Program: Classification of the Vegetation of Mount Rushmore National*  
1113 *Memorial*. Project Report. U.S. Geological Survey.
- 1114 Marriot H, McAdams A, Stutzman D, Drake J, Grossman D. (2012a) *USGS-NPS Vegetation*  
1115 *Mapping Program: Classification of the Vegetation of Jewel Cave National*  
1116 *Monument*. Project Report. U.S. Geological Survey.
- 1117 Marriot H, McAdams A, Stutzman D, Drake J, Grossman D. (2012b) *USGS-NPS Vegetation*  
1118 *Mapping Program: Classification of the Vegetation of Devils Tower National*  
1119 *Monument*. Project Report. U.S. Geological Survey.
- 1120 Matthews L. (2012) *Cape Fear Riparian Vegetation Data*.  
1121 [http://vegbank.org/cite/urn:lsid:cvs.bio.unc.edu:observation:7350-{46DDE438-83DC-](http://vegbank.org/cite/urn:lsid:cvs.bio.unc.edu:observation:7350-{46DDE438-83DC-4C25-8F03-07CFE23450EE})  
1122 [4C25-8F03-07CFE23450EE}](http://vegbank.org/cite/urn:lsid:cvs.bio.unc.edu:observation:7350-{46DDE438-83DC-4C25-8F03-07CFE23450EE}). Accessed: 09/01/2013.
- 1123 Matthews L. (2012) *Yadkin-Pee Dee & Catawba Riparian Vegetation Data*.  
1124 [http://vegbank.org/cite/urn:lsid:cvs.bio.unc.edu:observation:8207-%7B52904CDF-](http://vegbank.org/cite/urn:lsid:cvs.bio.unc.edu:observation:8207-%7B52904CDF-10AC-486D-A492-8CF16BC51CD9%7D)  
1125 [10AC-486D-A492-8CF16BC51CD9%7D](http://vegbank.org/cite/urn:lsid:cvs.bio.unc.edu:observation:8207-%7B52904CDF-10AC-486D-A492-8CF16BC51CD9%7D). Accessed: 09/01/2013.
- 1126 McKenzie B. (1987) Composition, pattern and diversity of some Transkeian grasslands. *J*  
1127 *Grassl Soc Southern Afr* 4:135–138. doi:10.1080/02566702.1987.9648091.

- 1128 McMillan P, Kjellmark E. (2012) *Longleaf – Coastal SC & GA Vegetation Data*.  
1129 <http://vegbank.org/cite/urn:lsid:cvs.bio.unc.edu:observation:2708-%7B72B2B40D->  
1130 [41FE-4436-ABE5-CE4B753C2898%7D](http://vegbank.org/cite/urn:lsid:cvs.bio.unc.edu:observation:2708-%7B72B2B40D-41FE-4436-ABE5-CE4B753C2898%7D). Accessed: 09 January 2013.
- 1131 Michiels B, Babatounde S, Dahouda M, Chabi SLW, Buldgen A. (2000) Botanical composition  
1132 and nutritive value of forage consumed by sheep during the rainy season in a  
1133 Sudano-Guinean savanna (central Benin). *Trop Grassl Soc* 34:43–47.
- 1134 Miehe G, Bach K, Miehe S, Kluge J, Yang Y, Duo L, Co S, Wesche K. (2011) Alpine steppe plant  
1135 communities of the Tibetan Highlands. *Appl Veg Sci* 14:547–560. doi:10.1111/j.1654-  
1136 109X.2011.01147.x.
- 1137 Morgan JW. (1998) Composition and seasonal flux of the soil seed bank of species-rich  
1138 *Themeda triandra* grasslands in relation to burning history. *J Veg Sci* 9:145–156.
- 1139 Moyo CS, Campbell BM. (1998) Grass species composition, yield and quality under and  
1140 outside tree crowns in a semi-arid rangeland in south-western Zimbabwe. *Afr J Range*  
1141 *Forage Sci* 15:23–34. doi:10.1080/10220119.1998.9647937.
- 1142 Mucina L, Rutherford MC. (eds) (2010) *The Vegetation of South Africa, Lesotho and*  
1143 *Swaziland*. South African National Biodiversity Institute, Pretoria, ZA. (CD Set).
- 1144 Mucina L, Rutherford MC. (eds) (2006) *The Vegetation of South Africa, Lesotho and*  
1145 *Swaziland*. South African National Biodiversity Institute, Pretoria, ZA.
- 1146 Mucina L, Rutherford MC, Powrie LW. (eds) (2007) *Vegetation Map of South Africa, Lesotho*  
1147 *and Swaziland, edn 2. 1:1 000 000 Scale Sheet Maps*. South African National  
1148 Biodiversity Institute, Pretoria, ZA.
- 1149 Mucina L, Rutherford MC, Powrie LW, van Niekerk A, van der Merwe JH. (eds) (2014)  
1150 *Vegetation Field Atlas of Continental South Africa, Lesotho and Swaziland*. South  
1151 African National Biodiversity Institute, Pretoria, ZA.
- 1152 Müller SC, Waechter JL. (2001) Estrutura sinusal dos componentes herbáceo e arbustivo de  
1153 uma floresta costeira subtropical. *Rev Brasil Bot* 24:395–406.
- 1154 Nachtergaele F, Batjes N. (2012) *Harmonized World Soil Database*. FAO, Rome, IT.
- 1155 NatureServe. (2004) *International Ecological Classification Standard: Terrestrial Ecological*  
1156 *Classifications*. NatureServe, Arlington, VA.

- 1157 Neid S, Stevens JE, Forest K, Fink M. (2007) *Sand Creek Massacre National Historic Site:*  
1158 *Vegetation Classification and Mapping*. Natural Resource Technical Report  
1159 NPS/SOPN/NRTR—2007/050. National Park Service, Fort Collins, CO.
- 1160 New South Wales Office of Environment and Heritage. (2014) *Data from the Atlas of NSW*  
1161 *Database: VIS Flora Survey Module, Version 11 /2013*. ÆKOS Data Portal  
1162 (<http://www.portal.aekos.org.au/>). Accessed: 16 July 2014.
- 1163 Ngwenya P. (2012) Herbaceous plant species richness and composition in Moist Midlands  
1164 Mistbelt Grasslands in KwaZulu-Natal: Is there a relationship to veld condition? *Afr J*  
1165 *Range Forage Sci* 29:75–83. doi:10.2989/10220119.2012.705324.
- 1166 Noor Alhamad M. (2006) Ecological and species diversity of arid Mediterranean grazing land  
1167 vegetation. *J Arid Environ* 66:698–715.
- 1168 Nordman C. (2012) *Holly Springs National Forest Vegetation Data*.  
1169 <http://vegbank.org/cite/VB.ob.27092.HOLL1>. Accessed: 09 January 2013.
- 1170 Nordman C, Anglin G. (2012) *Osceola National Forest Vegetation Data*.  
1171 <http://vegbank.org/cite/VB.ob.27002.OSCE27>. Accessed: 09 January 2013.
- 1172 Nordman C, Schultz G. (2012) *Osceola National Forest Vegetation Data*.  
1173 <http://vegbank.org/cite/VB.ob.26974.OCAL32>. Accessed: 09 January 2013.
- 1174 Nordman C, Pierce R. (2012) *Delta National Forest Vegetation Data*.  
1175 <http://vegbank.org/cite/VB.ob.27106.DELT9>. Accessed: 09 January 2013.
- 1176 O'Connor TG. (1994) Composition and population responses of an African savanna grassland  
1177 to rainfall and grazing. *J Appl Ecol* 31:155–171.
- 1178 O'Connor TG, Martindale G, Morris CD, Short A, Witkowski ETF, Scott-Shaw R. (2011)  
1179 Influence of grazing management on plant diversity of Highland Sourveld Grassland,  
1180 KwaZulu-Natal, South Africa. *Rangel Ecol Manage* 64:196–207. doi:10.2111/REM-D-  
1181 10-00062.1.
- 1182 Ode D. (2012) *LaFramboise Island Management Plan Vegetation Data*.  
1183 <http://vegbank.org/cite/VB.ob.28253.LFILOT1>. Accessed: 09 January 2013.
- 1184 Pandey CB, Singh JS. (1991) Influence of grazing and soil conditions on secondary savanna  
1185 vegetation in India. *J Veg Sci* 2:95–102.

- 1186 Parsons DAB, Shackleton CM, Scholes RJ. (1997) Changes in herbaceous layer condition  
1187 under contrasting land use systems in the semi-arid Lowveld, South Africa. *J Arid*  
1188 *Environ* 37:319–329. doi:10.1006/jare.1997.0283.
- 1189 Patterson K, Pyne M. (2012) *Bankhead National Forest Vegetation Data*.  
1190 <http://vegbank.org/cite/VB.ob.26740.BANK24>. Accessed: 09 January 2013.
- 1191 Pattiselanno F, Arobaya AYS. (2009) Grazing habitat of the Rusa Deer (*Cervus timorensis*) in  
1192 the Upland Kebar, Manokwari. *Biodiversitas* 10:134–138.
- 1193 Peet R, Lee M, Boyle F, Wentworth T, Schafale M, Weakley A. (2012) Vegetation-plot  
1194 database of the Carolina Vegetation Survey. *Biodivers Ecol* 4:243–253.
- 1195 Peet RK. (1975) *Forest Vegetation of the East Slope of the Northern Colorado Front Range*.  
1196 PhD thesis, Cornell University, Ithaca, NY.
- 1197 Peet RK. (2012) *Maritime Forests Vegetation Data*.  
1198 [http://vegbank.org/cite/urn:lsid:cvs.bio.unc.edu:observation:714-%7B5C325A03-](http://vegbank.org/cite/urn:lsid:cvs.bio.unc.edu:observation:714-%7B5C325A03-C818-430F-B4C9-EFBED2272AF0%7D)  
1199 [C818-430F-B4C9-EFBED2272AF0%7D](http://vegbank.org/cite/urn:lsid:cvs.bio.unc.edu:observation:714-%7B5C325A03-C818-430F-B4C9-EFBED2272AF0%7D). Accessed: 09 January 2013.
- 1200 Peet RK, Lee MT, Jennings MD, Faber-Langendoen D. (2012) VegBank – A permanent, open-  
1201 access archive for vegetation-plot data. *Biodivers Ecol* 4:233–241
- 1202 Peet RK, Lee MT, Jennings MD, Faber-Langendoen D. (eds) (2013) *VegBank: The vegetation*  
1203 *plot archive of the Ecological Society of America*. Accessed: 09 January 2013.
- 1204 Podniesinski GS, Sneddon LA, Lundgren J, Devine H, Slocumb B, Koch F. (2005) *Vegetation*  
1205 *classification and mapping of Valley Forge National Historical Park*. Technical Report  
1206 NPS/NER/NRTR—2005/028. National Park Service, Philadelphia, PA.
- 1207 Poilecot P, Gaidet N. (2011) A quantitative study of the grass and woody layers of a mopane  
1208 (*Colophospermum mopane*) savannah in the mid-Zambezi Valley, Zimbabwe. *Afr J*  
1209 *Ecol* 49:150–164.
- 1210 Powrie L, Rutherford MC, Mucina L, Mangwale K. (2012) National Vegetation Database of  
1211 South Africa. *Biodivers Ecol* 4:299–299.
- 1212 Pyne M, Schmidt J. (2012) *Oconee National Forest Vegetation Data*.  
1213 <http://vegbank.org/cite/VB.ob.26571.OCON46>. Accessed: 09 January 2013.
- 1214 Pyne M, Evans R. (2012) *Sabine National Forest Vegetation Data*.  
1215 <http://vegbank.org/cite/VB.ob.26862.SABI8>. Accessed: 09 January 2013.

- 1216 Pyne M, Stewart R. (2012) *Tuskegee National Forest Vegetation Data*.  
1217 <http://vegbank.org/cite/VB.ob.26949.TUSK3>. Accessed: 09 January 2013.
- 1218 Pyne M, Weakley A, Donaldson J. (2012) *Cherokee National Forest Vegetation Data*.  
1219 <http://vegbank.org/cite/VB.ob.26485.CHER29>. Accessed: 09 January 2013.
- 1220 Pyne M, Evans R, Spaulding D, Garland B. (2012) *Talladega National Forest Vegetation Data*.  
1221 <http://vegbank.org/cite/VB.ob.26732.TALT38>. Accessed: 09 January 2013.
- 1222 Queensland Herbarium. (2012) *Queensland CORVEG Database, Version 9 /2013*. ÆKOS Data  
1223 Portal (<http://www.portal.aekos.org.au>. Accessed: 16 July 2014).
- 1224 Reemts C. (2012) *Fort Hood Vegetation Map*.  
1225 <http://vegbank.org/cite/VB.ob.27632.FTHD225>. Accessed: 09 January 2013.
- 1226 Regass, T. (2005) *An Ecological Study of Vegetation Around Lake Abijata*. PhD Thesis, Addis  
1227 Ababa University, Addis Ababa, ET.  
1228 <http://localhost:80/xmlui/handle/123456789/8502>
- 1229 Reis AMS., Araújo EL, Ferraz EM, Moura AN. (2006) Inter-annual variations in the floristic and  
1230 population structure of an herbaceous community of 'caatinga' vegetation in  
1231 Pernambuco, Brazil. *Rev Brasil Bot* 29:497–508.
- 1232 Reschke C, Reid R, Jones J, Feeney T, Potter H. (1999) *Conserving Great Lakes Alvars: Final*  
1233 *Technical Report of the International Alvar Conservation Initiative*. The Nature  
1234 Conservancy, Chicago, IL.
- 1235 Rolfsmeier S, Drake J, Grossman D. (1998) *USGS-NPS Vegetation Mapping Program:*  
1236 *Classification of the Vegetation of Agate Fossil Beds National Monument*. Project  
1237 Report. U.S. Geological Survey.
- 1238 Rolfsmeier S, Steinauer G, Schneider R, Drake J, Aldrich J, Faber-Langendoen D, Goodin K,  
1239 Swinehart C, Grossman D. (1998) *USGS-NPS/BRD Vegetation Mapping Program:*  
1240 *Classification of the Vegetation of Scotts Bluff National Monument*. Project Report.  
1241 U.S. Geological Survey.
- 1242 Roy DP, Boschetti L, Justice CO, Ju J. (2008) The collection 5 MODIS burned area product–  
1243 Global evaluation by comparison with the MODIS active fire product. *Rem Sens*  
1244 *Environ* 112:3690–3707.
- 1245 Salama FM, Ahmed MK, El-Tayeh NA, Hammad SA. (2012) Vegetation analysis, phenological  
1246 patterns and chorological affinities in Wadi Qena, Eastern Desert, Egypt. *Afr J Ecol*

- 1247 50:193–  
1248 204.<http://onlinelibrary.wiley.com/doi/10.1111/j.13652028.2011.01313.x/full>.
- 1249 Salas DE, Folts-Zettner T, Sanders RW, Drake J. (2010) *Vegetation Classification and Mapping*  
1250 *at Chickasaw National Recreation Area*. National Park Service, Natural Resource  
1251 Program Center Fort Collins, CO.
- 1252 Sasaki T, Okayasu T, Takeuchi T, Jamsran U, Jadambaa S. (2005) Patterns of floristic  
1253 composition under different grazing intensities in Bulgan, South Gobi, Mongolia.  
1254 *Grassl Sci* 51:235–242. doi:10.1111/j.1744-697X.2005.00029.x.
- 1255 Savadogo P, Sawadogo L, Tiveau D. (2007) Effects of grazing intensity and prescribed fire on  
1256 soil physical and hydrological properties and pasture yield in the savanna woodlands  
1257 of Burkina Faso. *Agric Ecosyst Environ* 118:80–92. doi:10.1016/j.agee.2006.05.002.
- 1258 Sawadogo L, Tiveau D, Nygård R. (2005) Influence of selective tree cutting, livestock and  
1259 prescribed fire on herbaceous biomass in the savannah woodlands of Burkina Faso,  
1260 West Africa. *Agric Ecosyst Environ* 105:335–345. doi:10.1016/j.agee.2004.02.004.
- 1261 Schiebout M. (2012) *Pawnee Grassland Classification*.  
1262 <http://vegbank.org/cite/VB.ob.78868.001SCHIEB43A>. Accessed: 09 January 2013.
- 1263 Schirokauer D, Keeler-Wolf T, Meinke J, van der Leeden P. (2003) *Plant Community*  
1264 *Classification and Mapping Project: Point Reyes National Seashore, Golden Gate*  
1265 *National Recreation Area. San Francisco Water Department Watershed Lands, Mount*  
1266 *Tamalpais, Tomales Bay, and Samuel P. Taylor State Parks*. Project Report.
- 1267 Schmidt M, Janssen T, Dressler S, Hahn-Hadjali K, Hien M, Konaté S, Lykke AM, Mahamane A,  
1268 Sambou B, Sinsin B, Thiombiano A, Wittig R, Zizka G. (2012) The West African  
1269 Vegetation Database. *Biodivers Ecol* 4:105–110.
- 1270 Scott, K, Setterfield S, Douglas M, Andersen A. (2010) Soil seed banks confer resilience to  
1271 savanna grass-layer plants during seasonal disturbance. *Acta Oecol* 36:202–210.  
1272 doi:10.1016/j.actao.2009.12.007.
- 1273 Sexton JO, Song X-P, Feng M, Noojipady P, Anand A, Huang C. (2013) Global, 30-m resolution  
1274 continuous fields of tree cover: Landsat-based rescaling of MODIS vegetation  
1275 continuous fields with lidar-based estimates of error. *Int J Digit Earth* 6:427–448.



- 1276 Seymour S. (2012) *Piedmont Nonalluvials Vegetation Data*.  
1277 [http://vegbank.org/cite/urn:lsid:cvs.bio.unc.edu:observation:8902-%7BEB5FEBB4-](http://vegbank.org/cite/urn:lsid:cvs.bio.unc.edu:observation:8902-%7BEB5FEBB4-39FE-4565-BFA6-8DB75DF9B44E%7D)  
1278 [39FE-4565-BFA6-8DB75DF9B44E%7D](http://vegbank.org/cite/urn:lsid:cvs.bio.unc.edu:observation:8902-%7BEB5FEBB4-39FE-4565-BFA6-8DB75DF9B44E%7D). Accessed: 09 January 2013.
- 1279 Shelton L, Evans R. (2012) *Davy Crockett National Forest Vegetation Data*.  
1280 <http://vegbank.org/cite/VB.ob.27046.DAVY17>. Accessed: 09 January 2013.
- 1281 Shonhiwa FF. (1998) *The Effects of Land-use History on Plant Species Diversity and*  
1282 *Abundance in Dambo Wetlands of Zimbabwe*. PhD Thesis, West Virginia University,  
1283 Morgantown, WV. [http://wvuscholar.wvu.edu:8881/R/?func=dbin-jump-](http://wvuscholar.wvu.edu:8881/R/?func=dbin-jump-full&object_id=6697)  
1284 [full&object\\_id=6697](http://wvuscholar.wvu.edu:8881/R/?func=dbin-jump-full&object_id=6697)
- 1285 Short AD, O'Connor TG, Hurt CR. (2003) Medium-term changes in grass composition and  
1286 diversity of Highland Sourveld Grassland in the Southern Drakensberg in response to  
1287 fire and grazing management. *Afr J Range Forage Sci* 20:1–10.  
1288 doi:10.2989/10220110309485792.
- 1289 Sisay A, Baars RMT. (2002) Grass composition and rangeland condition of the major grazing  
1290 areas in the Mid Rift Valley, Ethiopia. *Afr J Range Forage Sci* 19:161–166.  
1291 doi:10.2989/10220110209485789.
- 1292 Sneddon L, Lundgren J, Crane E, Salmons S. (1998) *USGS-NBS/NPS Vegetation Mapping*  
1293 *Program: Vegetation Classification of Rock Creek Park*. Project Report. U.S. Geological  
1294 Survey.
- 1295 Soromessa T, Teketay D, Demissew S. (2004) Ecological study of the vegetation in Gamo Gofa  
1296 Zone, Southern Ethiopia. *Trop Ecol* 45:209–221.
- 1297 Sugiyama S, Zabed HM, Okubo A. (2008) Relationships between soil microbial diversity and  
1298 plant community structure in seminatural grasslands. *Grassl Sci* 54:117–124.  
1299 doi:10.1111/j.1744-697X.2008.00113.x.
- 1300 Tanimoto T. (1981) Vegetation of the Alang-alang grassland and its succession in the Benakat  
1301 District of South Sumatra Indonesia. *Bull For & For Prod Res Inst* 314:11–19.
- 1302 TERN AusPlots. (2013) *AusPlots Rangelands, Version 6 /2014*. ÆKOS Data Portal  
1303 (<http://www.aekos.org.au/>). Accessed: 16 July 2014.
- 1304 TERN Australian Transect Network. (2013) *South West Australian Transitional Transect*  
1305 *(SWATT), Version 11 /2014*. ÆKOS Data Portal (<http://www.portal.aekos.org.au/>).  
1306 Accessed: 16 July 2014.

- 1307 TERN Australian Transects. (2013) *Transect for Environmental Monitoring and Decision*  
1308 *Making (TREND), Version 6 /2014*. AEKOS Data Portal (<http://www.aekos.org.au/>).  
1309 Accessed: 16 July 2014.
- 1310 The Association for Biodiversity Information. (2001) *International Classification of Ecological*  
1311 *Communities: Terrestrial Vegetation*. The Association for Biodiversity Information,  
1312 Arlington, VA.
- 1313 The Nature Conservancy. (1999) *USGS-NPS Vegetation Mapping Program: Classification of*  
1314 *the Vegetation of Isle Royale National Park*. Project Report. U.S. Geological Survey.
- 1315 Thompson J. (2012) *New York Natural Heritage Program*.  
1316 <http://vegbank.org/cite/VB.Ob.24379.MINNREGPLT47>. Accessed: 09 January 2013.
- 1317 USGS National Gap Analysis Program. (2004) *Southwest Regional Gap Analysis Project Field*  
1318 *Sample Database. Version 1.1*. RS/GIS Laboratory, College of Natural Resources, Utah  
1319 State University.
- 1320 USGS. (2010) *Sequoia and Kings Canyon National Parks Vegetation Mapping Project*.  
1321 [http://www.usgs.gov/core\\_science\\_systems/csas/vip/parks/seki.html](http://www.usgs.gov/core_science_systems/csas/vip/parks/seki.html). Accessed: 09  
1322 January 2013.
- 1323 Verlinden A, Dayot B. (2005) A comparison between indigenous environmental knowledge  
1324 and a conventional vegetation analysis in North Central Namibia. *J Arid Environ*  
1325 62:143–175.
- 1326 Von Loh J, Cogan D, Butler J, Faber-Langendoen D, Crawford D, Pucherelli MJ. (2000) *USGS-*  
1327 *NPS Vegetation Mapping Program: Theodore Roosevelt National Park, North Dakota*.  
1328 Project Report. U.S. Geological Survey.
- 1329 Von Loh J, Cogan D, Faber-Langendoen D, Crawford D, Pucherelli MJ. (1999) *USGS-NPS*  
1330 *Vegetation Mapping Program: Badlands National Park, South Dakota*. Project Report.  
1331 U.S. Geological Survey.
- 1332 Walton D. (2012) *Shenandoah National Park Vegetation Data*.  
1333 <http://vegbank.org/cite/VB.Ob.25621.SHNP530>. Accessed: 09 January 2013.
- 1334 Weakley A, Patterson K. (2012) *Chattahoochee National Forest Vegetation Data*.  
1335 <http://vegbank.org/cite/VB.ob.26587.CHAT135>. Accessed: 09 January 2013.
- 1336 Weakley A, Stewart R. (2012) *Oakmulgee National Forest Vegetation Data*.  
1337 <http://vegbank.org/cite/VB.ob.26642.TALO31>. Accessed: 09 January 2013.

- 1338 Whelan KRT, Sudalter E, Patterson JM, Vargas RM, Atkinson AJ, Witcher B. (2009) *The 2009*  
1339 *Vegetation Map of De Soto National Memorial. Natural Resource Technical Report*  
1340 *NPS/SFCN/NRTR—2009/240*. National Park Service, Fort Collins, CO.  
1341 White R. (2005) *Vascular Plant Inventory and Plant Community Classification for Fort*
